# Supplementary material for: Effects of ionic liquid media on the cation selectivity of uranyl structural units in five new compounds produced using the ionothermal technique
Source: Royal Society of Chemistry journal article supplement (doi:10.1039/c4ce00270a), 2014-01-01
Supplement: c4ce00270a1.pdf [file c4ce00270a1.pdf]

## Supporting Information

### **Effects of ionic liquid media on the cation selectivity of uranyl structural units in five new compounds produced using the ionothermal technique**

E. M. Wylie<sup>a</sup>, P. A. Smith<sup>a</sup>, K. M. Peruski<sup>a</sup>, Jeremy S. Smith<sup>a</sup>, Megan K. Dustin<sup>a</sup>, and P. C. Burns<sup>\*a,b</sup>

<sup>a</sup> *Department of Civil and Environmental Engineering and Earth Sciences, University of Notre Dame, Notre Dame, IN 46556, USA*

<sup>b</sup> *Department of Chemistry and Biochemistry, University of Notre Dame, Notre Dame, IN 46556, USA*

#### **Contents**

**Figure S1:** UV-Vis-NIR spectra of compounds 1-5.

**Figure S2:** IR spectra of compounds 1-5.

**Figure S3:** Raman spectra of compounds 1-5.

**Figure S4:** EDAX spectrum of compound 1.

**Figure S5:** EDAX spectrum of compound 2.

**Figure S6:** EDAX spectrum of compound 3.

**Figure S7:** EDAX spectrum of compound 4.

**Figure S8:** EDAX spectrum of compound 5.

**Tables 1-4:** Full crystallographic parameters of compound 1.

**Tables 5-8:** Full crystallographic parameters of compound 2.

**Tables 9-12:** Full crystallographic parameters of compound 3.

**Tables 13-16:** Full crystallographic parameters of compound 4.

**Tables 17-20:** Full crystallographic parameters of compound 5.

**Tables 21-25:** Bond valence sums of compounds 1-5.

**Figure S1:** UV-vis-NIR spectra of compounds 1-5.

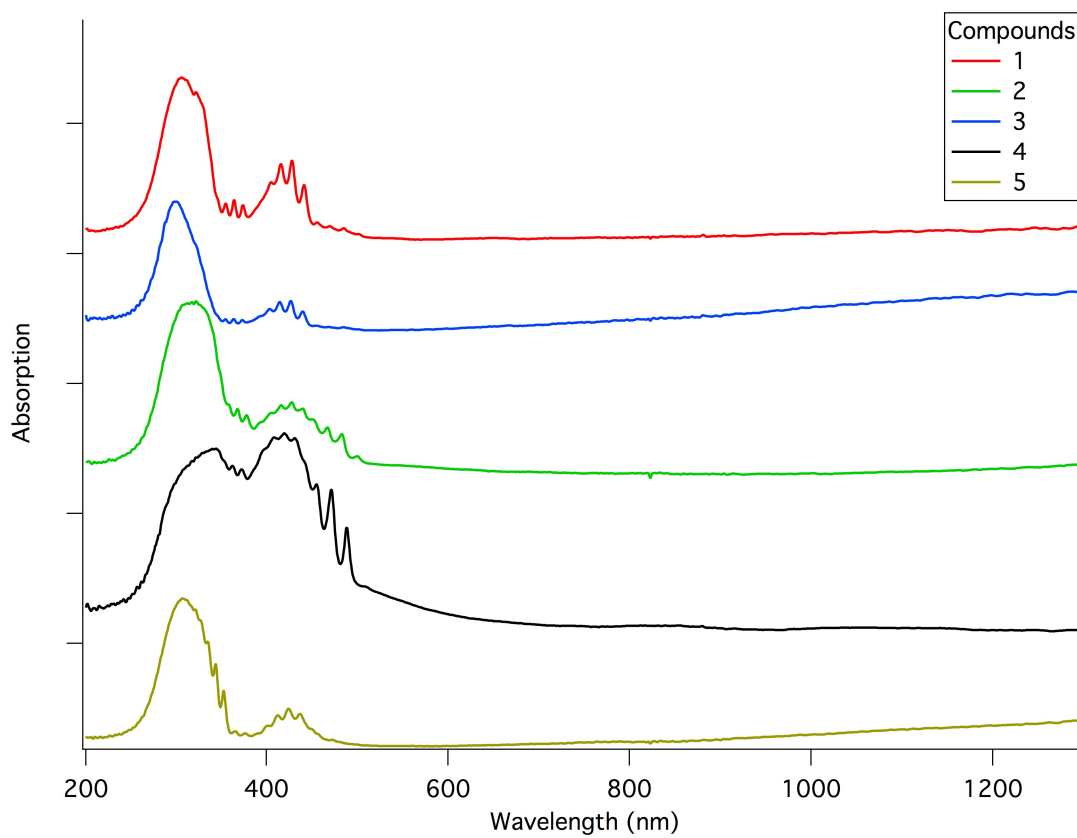

**Figure S2:** ATR-FTIR spectra of compounds 1-5.

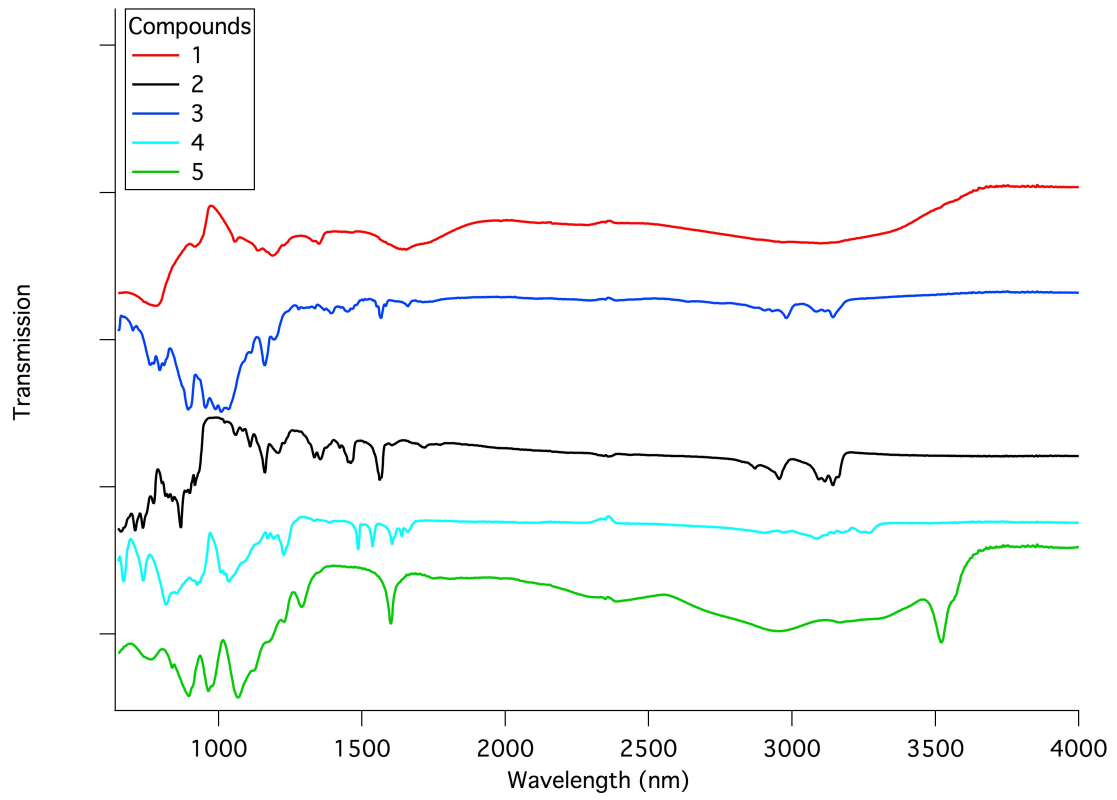

**Figure S3:** Raman spectra of compounds 1-5.

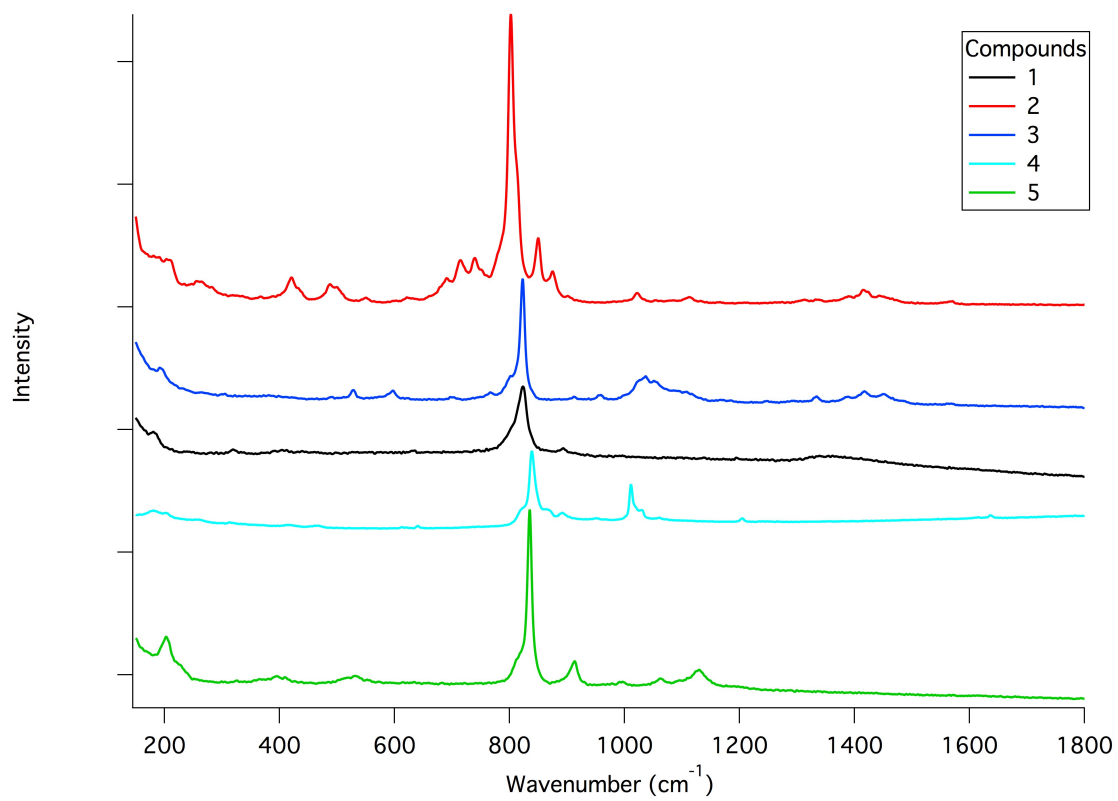

**Figure S4:** EDAX spectrum of compound 1.

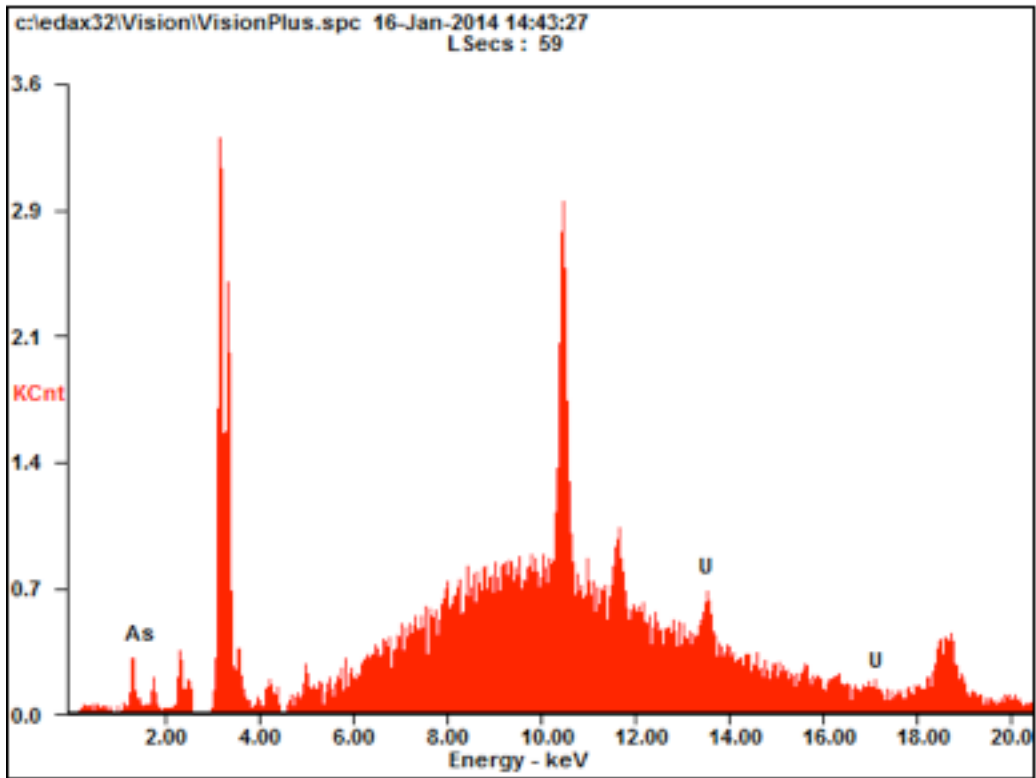

**Figure 5:** EDAX spectrum of compound 2.

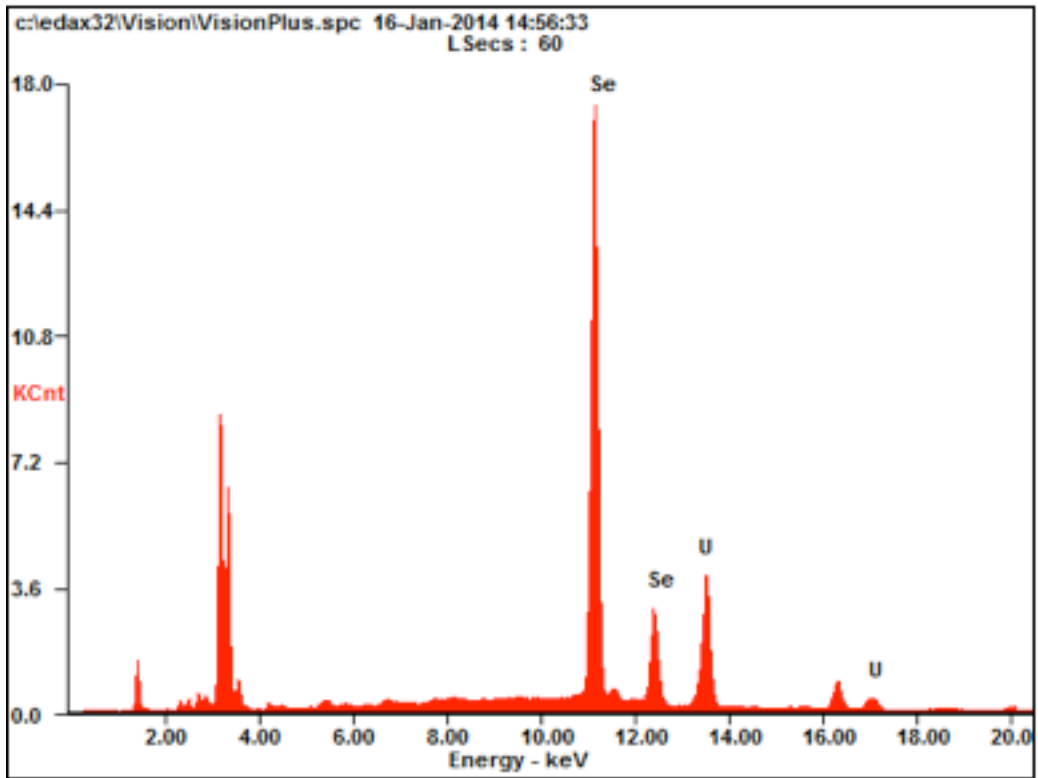

**Figure S6:** EDAX spectrum of compound 3.

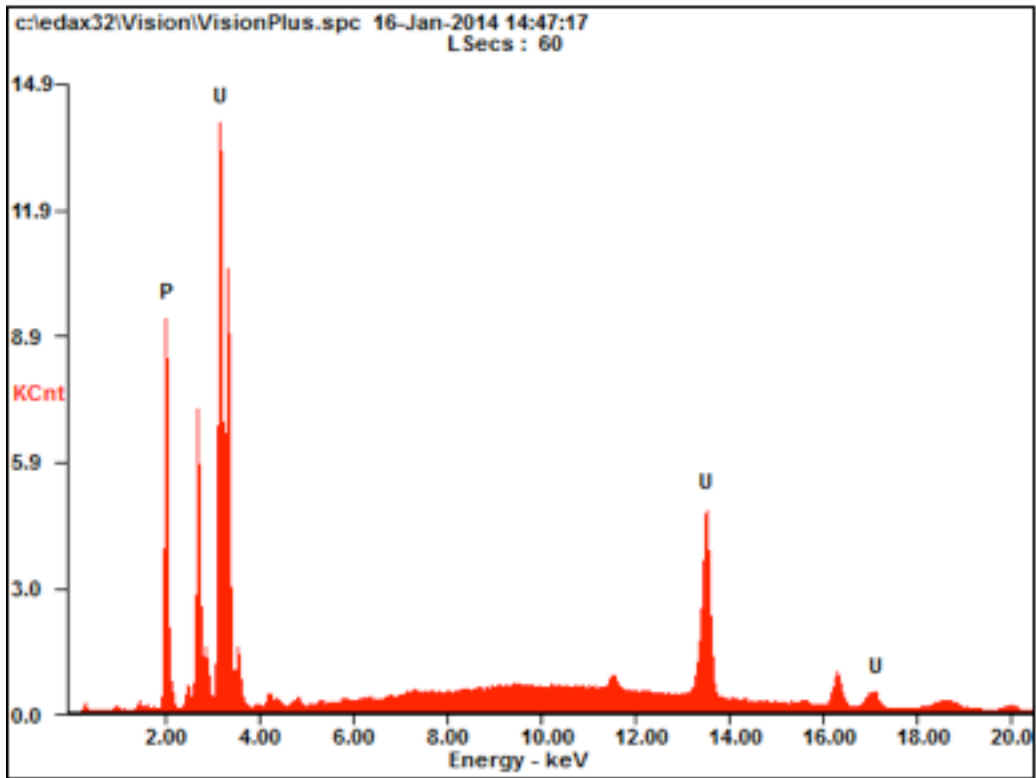

**Figure S7:** EDAX spectrum of compound 4.

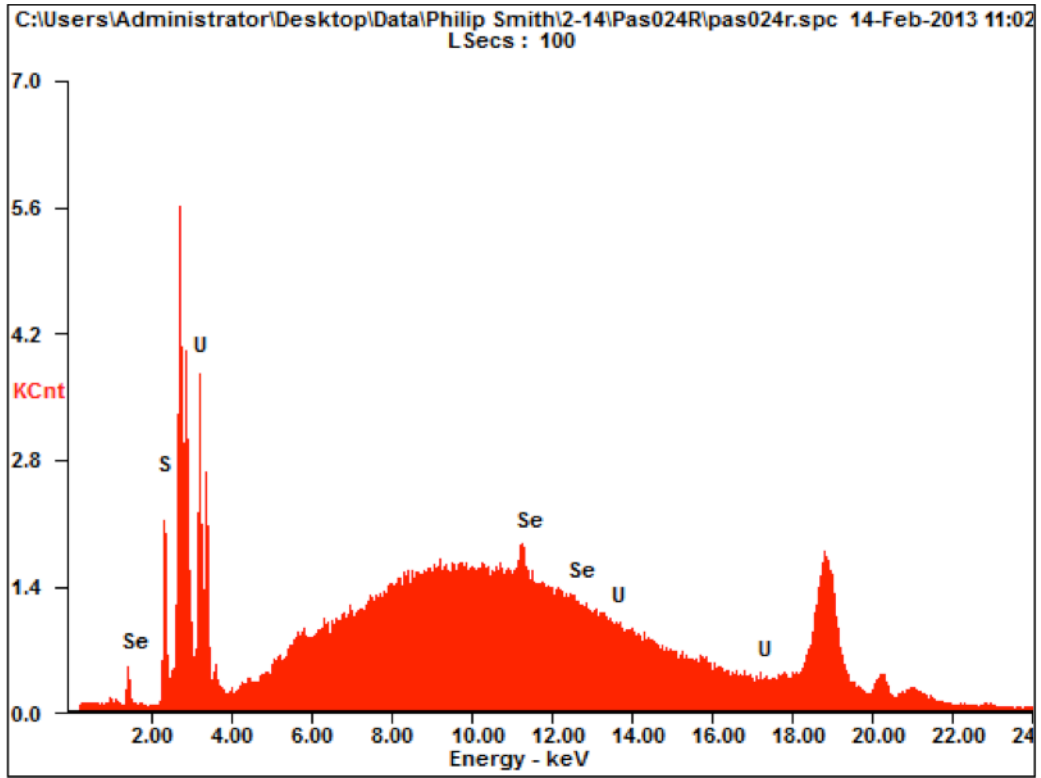



**Figure S8:** EDAX spectrum of compound 5.

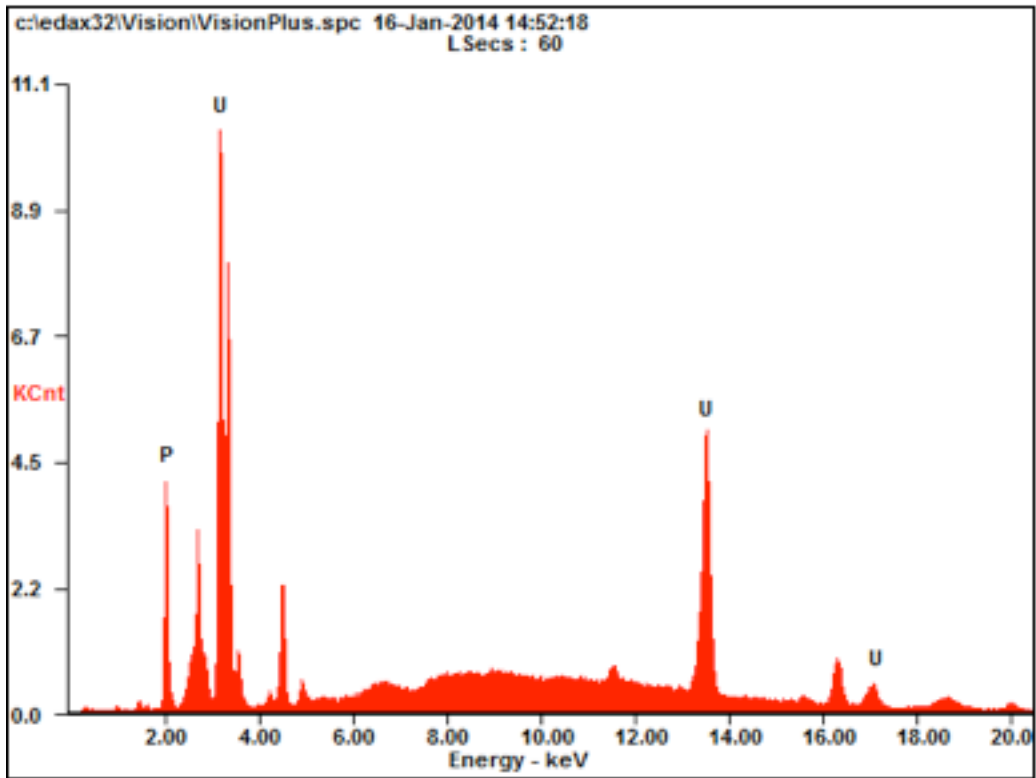

Table 1. Crystal data and structure refinement for C1.

|                                   |                                             |                            |
|-----------------------------------|---------------------------------------------|----------------------------|
| Identification code               | p1                                          |                            |
| Empirical formula                 | C4 As N2 O6 U                               |                            |
| Formula weight                    | 485.01                                      |                            |
| Temperature                       | 293(2) K                                    |                            |
| Wavelength                        | 0.71073 Å                                   |                            |
| Crystal system                    | Triclinic                                   |                            |
| Space group                       | P -1                                        |                            |
| Unit cell dimensions              | a = 7.170(3) Å                              | $\alpha = 73.511(4)^\circ$ |
|                                   | b = 7.181(3) Å                              | $\beta = 73.892(4)^\circ$  |
|                                   | c = 9.831(4) Å                              | $\gamma = 89.122(4)^\circ$ |
| Volume                            | 465.2(3) Å <sup>3</sup>                     |                            |
| Z                                 | 2                                           |                            |
| Density (calculated)              | 3.463 Mg/m <sup>3</sup>                     |                            |
| Absorption coefficient            | 20.980 mm <sup>-1</sup>                     |                            |
| F(000)                            | 422                                         |                            |
| Crystal size                      | 0.08 x 0.04 x 0.02 mm <sup>3</sup>          |                            |
| Theta range for data collection   | 2.25 to 27.59°                              |                            |
| Index ranges                      | -9 ≤ h ≤ 9, -9 ≤ k ≤ 9, -12 ≤ l ≤ 12        |                            |
| Reflections collected             | 5568                                        |                            |
| Independent reflections           | 2139 [R(int) = 0.0471]                      |                            |
| Completeness to theta = 27.59°    | 98.7 %                                      |                            |
| Absorption correction             | Semi-empirical from equivalents             |                            |
| Max. and min. transmission        | 0.7456 and 0.6810                           |                            |
| Refinement method                 | Full-matrix least-squares on F <sup>2</sup> |                            |
| Data / restraints / parameters    | 2139 / 0 / 67                               |                            |
| Goodness-of-fit on F <sup>2</sup> | 1.013                                       |                            |
| Final R indices [I > 2σ(I)]       | R1 = 0.0319, wR2 = 0.0627                   |                            |
| R indices (all data)              | R1 = 0.0412, wR2 = 0.0659                   |                            |
| Largest diff. peak and hole       | 1.281 and -1.913 e. Å <sup>-3</sup>         |                            |

Table 2. Atomic coordinates ( $\times 10^4$ ) and equivalent isotropic displacement parameters ( $\text{\AA}^2 \times 10^3$ ) for C1.  $U(\text{eq})$  is defined as one third of the trace of the orthogonalized  $U^{ij}$  tensor.

|       | x         | y        | z        | $U(\text{eq})$ |
|-------|-----------|----------|----------|----------------|
| U(1)  | 7063(1)   | 2211(1)  | 1011(1)  | 6(1)           |
| As(1) | 7533(1)   | 7480(1)  | 79(1)    | 6(1)           |
| O(1)  | 7821(7)   | 3105(7)  | -970(6)  | 10(1)          |
| O(2)  | 7333(7)   | 5249(7)  | 1270(6)  | 8(1)           |
| O(3)  | 9814(8)   | 8092(7)  | -1053(6) | 10(1)          |
| O(4)  | 6145(7)   | 7486(7)  | -1067(6) | 9(1)           |
| O(5)  | 6255(7)   | 1392(7)  | 2994(6)  | 8(1)           |
| O(6)  | 6803(8)   | 9069(8)  | 1031(6)  | 10(1)          |
| N(1)  | 1290(9)   | 7181(9)  | 4727(7)  | 11(1)          |
| N(2)  | -1445(9)  | 7199(9)  | 6309(7)  | 10(1)          |
| C(1)  | 355(12)   | 6606(12) | 6152(9)  | 13(2)          |
| C(2)  | 48(12)    | 8160(12) | 3927(9)  | 14(2)          |
| C(3)  | -1687(12) | 8164(12) | 4949(9)  | 17(2)          |
| C(4)  | 3366(13)  | 6944(13) | 4077(10) | 19(2)          |

Table 3. Bond lengths [ $\text{\AA}$ ] and angles [ $^\circ$ ] for C1.

---

|                    |            |
|--------------------|------------|
| U(1)-O(5)          | 1.793(5)   |
| U(1)-O(1)          | 1.793(5)   |
| U(1)-O(3)#1        | 2.257(5)   |
| U(1)-O(6)#2        | 2.261(5)   |
| U(1)-O(2)          | 2.283(5)   |
| U(1)-O(4)#3        | 2.294(5)   |
| As(1)-O(6)         | 1.663(5)   |
| As(1)-O(2)         | 1.675(5)   |
| As(1)-O(3)         | 1.685(5)   |
| As(1)-O(4)         | 1.697(5)   |
| O(3)-U(1)#1        | 2.257(5)   |
| O(4)-U(1)#3        | 2.294(5)   |
| O(6)-U(1)#4        | 2.261(5)   |
| N(1)-C(1)          | 1.320(10)  |
| N(1)-C(2)          | 1.400(10)  |
| N(1)-C(4)          | 1.476(11)  |
| N(2)-C(1)          | 1.334(10)  |
| N(2)-C(3)          | 1.378(10)  |
| C(2)-C(3)          | 1.365(11)  |
|                    |            |
| O(5)-U(1)-O(1)     | 178.0(2)   |
| O(5)-U(1)-O(3)#1   | 90.4(2)    |
| O(1)-U(1)-O(3)#1   | 90.8(2)    |
| O(5)-U(1)-O(6)#2   | 88.0(2)    |
| O(1)-U(1)-O(6)#2   | 93.6(2)    |
| O(3)#1-U(1)-O(6)#2 | 90.21(19)  |
| O(5)-U(1)-O(2)     | 85.7(2)    |
| O(1)-U(1)-O(2)     | 92.7(2)    |
| O(3)#1-U(1)-O(2)   | 87.64(18)  |
| O(6)#2-U(1)-O(2)   | 173.36(18) |
| O(5)-U(1)-O(4)#3   | 87.4(2)    |
| O(1)-U(1)-O(4)#3   | 91.3(2)    |
| O(3)#1-U(1)-O(4)#3 | 177.72(19) |
| O(6)#2-U(1)-O(4)#3 | 90.35(18)  |

|                   |           |
|-------------------|-----------|
| O(2)-U(1)-O(4)#3  | 91.56(18) |
| O(6)-As(1)-O(2)   | 108.9(3)  |
| O(6)-As(1)-O(3)   | 111.5(3)  |
| O(2)-As(1)-O(3)   | 111.9(3)  |
| O(6)-As(1)-O(4)   | 110.8(3)  |
| O(2)-As(1)-O(4)   | 108.9(2)  |
| O(3)-As(1)-O(4)   | 104.7(3)  |
| As(1)-O(2)-U(1)   | 132.3(3)  |
| As(1)-O(3)-U(1)#1 | 140.4(3)  |
| As(1)-O(4)-U(1)#3 | 137.3(3)  |
| As(1)-O(6)-U(1)#4 | 145.2(3)  |
| C(1)-N(1)-C(2)    | 109.7(7)  |
| C(1)-N(1)-C(4)    | 125.3(7)  |
| C(2)-N(1)-C(4)    | 124.9(7)  |
| C(1)-N(2)-C(3)    | 110.4(7)  |
| N(1)-C(1)-N(2)    | 107.5(7)  |
| C(3)-C(2)-N(1)    | 106.1(7)  |
| C(2)-C(3)-N(2)    | 106.3(7)  |

---

Symmetry transformations used to generate equivalent atoms:

#1 -x+2,-y+1,-z #2 x,y-1,z #3 -x+1,-y+1,-z

#4 x,y+1,z

Table 4. Anisotropic displacement parameters ( $\text{\AA}^2 \times 10^3$ ) for C1. The anisotropic displacement factor exponent takes the form:  $-2\pi^2 [ h^2 a^{*2} U^{11} + \dots + 2 h k a^* b^* U^{12} ]$

|       | U <sup>11</sup> | U <sup>22</sup> | U <sup>33</sup> | U <sup>23</sup> | U <sup>13</sup> | U <sup>12</sup> |
|-------|-----------------|-----------------|-----------------|-----------------|-----------------|-----------------|
| U(1)  | 7(1)            | 6(1)            | 7(1)            | -2(1)           | -2(1)           | 1(1)            |
| As(1) | 7(1)            | 4(1)            | 9(1)            | -2(1)           | -3(1)           | 1(1)            |

Table 5. Crystal data and structure refinement for C2.

|                                   |                                             |                       |
|-----------------------------------|---------------------------------------------|-----------------------|
| Identification code               | pnmax                                       |                       |
| Empirical formula                 | C16 N4 O23 Se5 U4                           |                       |
| Formula weight                    | 1963.12                                     |                       |
| Temperature                       | 298(2) K                                    |                       |
| Wavelength                        | 0.71073 Å                                   |                       |
| Crystal system                    | Orthorhombic                                |                       |
| Space group                       | Pnma                                        |                       |
| Unit cell dimensions              | a = 18.860(2) Å                             | $\alpha = 90^\circ$ . |
|                                   | b = 18.010(2) Å                             | $\beta = 90^\circ$ .  |
|                                   | c = 11.1408(13) Å                           | $\gamma = 90^\circ$ . |
| Volume                            | 3784.3(8) Å <sup>3</sup>                    |                       |
| Z                                 | 4                                           |                       |
| Density (calculated)              | 3.446 Mg/m <sup>3</sup>                     |                       |
| Absorption coefficient            | 21.960 mm <sup>-1</sup>                     |                       |
| F(000)                            | 3384                                        |                       |
| Crystal size                      | 0.09 x 0.07 x 0.05 mm <sup>3</sup>          |                       |
| Theta range for data collection   | 2.12 to 27.54°.                             |                       |
| Index ranges                      | -24 ≤ h ≤ 24, -23 ≤ k ≤ 23, -14 ≤ l ≤ 14    |                       |
| Reflections collected             | 42673                                       |                       |
| Independent reflections           | 4507 [R(int) = 0.0898]                      |                       |
| Completeness to theta = 27.54°    | 99.9 %                                      |                       |
| Absorption correction             | Semi-empirical from equivalents             |                       |
| Max. and min. transmission        | 0.7456 and 0.4216                           |                       |
| Refinement method                 | Full-matrix least-squares on F <sup>2</sup> |                       |
| Data / restraints / parameters    | 4507 / 0 / 137                              |                       |
| Goodness-of-fit on F <sup>2</sup> | 1.149                                       |                       |
| Final R indices [I > 2σ(I)]       | R1 = 0.0499, wR2 = 0.1046                   |                       |
| R indices (all data)              | R1 = 0.0680, wR2 = 0.1103                   |                       |
| Largest diff. peak and hole       | 5.895 and -2.083 e. Å <sup>-3</sup>         |                       |

Table 6. Atomic coordinates ( $\times 10^4$ ) and equivalent isotropic displacement parameters ( $\text{\AA}^2 \times 10^3$ ) for C2.  $U(\text{eq})$  is defined as one third of the trace of the orthogonalized  $U_{ij}$  tensor.

|       | x        | y         | z         | $U(\text{eq})$ |
|-------|----------|-----------|-----------|----------------|
| U(1)  | 2110(1)  | 542(1)    | 5519(1)   | 17(1)          |
| U(2)  | 1868(1)  | 2500      | 7412(1)   | 15(1)          |
| U(3)  | 1669(1)  | 2500      | 11214(1)  | 15(1)          |
| Se(1) | 2029(1)  | 2500      | 4433(2)   | 16(1)          |
| Se(2) | 3135(1)  | -561(1)   | 7391(1)   | 22(1)          |
| Se(3) | 1834(1)  | 905(1)    | 8950(1)   | 20(1)          |
| O(1)  | 1874(5)  | 1121(5)   | 7441(8)   | 20(2)          |
| O(2)  | 1776(5)  | 1835(5)   | 5482(8)   | 18(2)          |
| O(3)  | 1950(5)  | 1816(5)   | 9350(8)   | 19(2)          |
| O(4)  | 1429(7)  | 2500      | 3373(11)  | 18(3)          |
| O(5)  | 2615(5)  | 501(5)    | 9218(8)   | 23(2)          |
| O(6)  | 2788(7)  | 2500      | 7240(13)  | 25(3)          |
| O(7)  | 758(7)   | 2500      | 10872(12) | 20(3)          |
| O(8)  | 2317(5)  | -427(5)   | 6781(8)   | 23(2)          |
| O(9)  | 951(7)   | 2500      | 7554(13)  | 26(3)          |
| O(10) | 3021(5)  | 777(6)    | 5622(9)   | 30(2)          |
| O(11) | 2586(7)  | 2500      | 11618(12) | 23(3)          |
| O(12) | 3476(5)  | -1233(5)  | 6524(9)   | 24(2)          |
| O(13) | 1220(5)  | 260(6)    | 5394(9)   | 29(2)          |
| O(14) | 2892(6)  | -1039(6)  | 8621(9)   | 30(2)          |
| N(1)  | 787(11)  | -1475(12) | 7002(19)  | 73(6)          |
| N(2)  | 585(12)  | -1440(12) | 5070(20)  | 81(6)          |
| C(1)  | 1086(13) | -1435(13) | 5870(20)  | 66(6)          |
| C(2)  | 57(14)   | 1518(15)  | 4300(20)  | 73(7)          |
| C(3)  | 1110(17) | -1376(18) | 8240(30)  | 103(10)        |
| C(4)  | 721(18)  | -1448(19) | 3830(30)  | 106(10)        |
| C(5)  | 5039(19) | -1490(20) | 8100(30)  | 116(12)        |
| C(6)  | -281(18) | 879(19)   | 6760(30)  | 107(10)        |
| C(7)  | 4630(30) | 1110(30)  | 6760(40)  | 178(19)        |
| C(8)  | 4930(30) | 420(30)   | 6260(40)  | 170(18)        |





Table 7. Bond lengths [ $\text{\AA}$ ] and angles [ $^\circ$ ] for C2.

---

|              |            |
|--------------|------------|
| U(1)-O(13)   | 1.760(10)  |
| U(1)-O(10)   | 1.772(10)  |
| U(1)-O(8)    | 2.275(10)  |
| U(1)-O(14)#1 | 2.296(10)  |
| U(1)-O(2)    | 2.412(9)   |
| U(1)-O(1)    | 2.423(9)   |
| U(1)-O(5)#1  | 2.429(10)  |
| U(1)-Se(2)   | 3.4687(14) |
| U(2)-O(9)    | 1.737(14)  |
| U(2)-O(6)    | 1.745(14)  |
| U(2)-O(2)#2  | 2.467(9)   |
| U(2)-O(2)    | 2.467(9)   |
| U(2)-O(1)#2  | 2.483(9)   |
| U(2)-O(1)    | 2.483(9)   |
| U(2)-O(3)    | 2.491(9)   |
| U(2)-O(3)#2  | 2.491(9)   |
| U(2)-Se(1)   | 3.3323(19) |
| U(2)-Se(3)   | 3.3463(13) |
| U(2)-Se(3)#2 | 3.3464(13) |
| U(3)-O(7)    | 1.759(13)  |
| U(3)-O(11)   | 1.788(14)  |
| U(3)-O(12)#3 | 2.325(10)  |
| U(3)-O(12)#4 | 2.325(10)  |
| U(3)-O(4)#5  | 2.448(13)  |
| U(3)-O(3)    | 2.472(9)   |
| U(3)-O(3)#2  | 2.472(9)   |
| Se(1)-O(4)   | 1.635(13)  |
| Se(1)-O(2)#2 | 1.740(9)   |
| Se(1)-O(2)   | 1.740(9)   |
| Se(2)-O(12)  | 1.676(10)  |
| Se(2)-O(14)  | 1.683(10)  |
| Se(2)-O(8)   | 1.703(10)  |
| Se(3)-O(5)   | 1.670(10)  |
| Se(3)-O(3)   | 1.714(9)   |

|              |           |
|--------------|-----------|
| Se(3)-O(1)   | 1.728(9)  |
| O(4)-U(3)#6  | 2.448(13) |
| O(5)-U(1)#4  | 2.429(10) |
| O(12)-U(3)#1 | 2.325(10) |
| O(14)-U(1)#4 | 2.296(10) |
| N(1)-C(1)    | 1.39(3)   |
| N(1)-C(5)#7  | 1.41(4)   |
| N(1)-C(3)    | 1.52(3)   |
| N(2)-C(1)    | 1.30(3)   |
| N(2)-C(4)    | 1.40(4)   |
| N(2)-C(2)#8  | 1.41(3)   |
| C(2)-C(5)#1  | 1.35(4)   |
| C(2)-N(2)#8  | 1.41(3)   |
| C(4)-C(6)#8  | 1.48(4)   |
| C(5)-C(2)#4  | 1.35(4)   |
| C(5)-N(1)#9  | 1.41(4)   |
| C(6)-C(4)#8  | 1.48(4)   |
| C(6)-C(7)#7  | 1.71(5)   |
| C(7)-C(8)    | 1.47(6)   |
| C(7)-C(6)#9  | 1.71(5)   |

|                    |          |
|--------------------|----------|
| O(13)-U(1)-O(10)   | 176.9(5) |
| O(13)-U(1)-O(8)    | 89.4(4)  |
| O(10)-U(1)-O(8)    | 88.7(4)  |
| O(13)-U(1)-O(14)#1 | 92.2(4)  |
| O(10)-U(1)-O(14)#1 | 88.2(4)  |
| O(8)-U(1)-O(14)#1  | 150.3(4) |
| O(13)-U(1)-O(2)    | 91.7(4)  |
| O(10)-U(1)-O(2)    | 91.4(4)  |
| O(8)-U(1)-O(2)     | 142.7(3) |
| O(14)#1-U(1)-O(2)  | 66.9(3)  |
| O(13)-U(1)-O(1)    | 91.1(4)  |
| O(10)-U(1)-O(1)    | 91.0(4)  |
| O(8)-U(1)-O(1)     | 79.4(3)  |
| O(14)#1-U(1)-O(1)  | 130.2(3) |
| O(2)-U(1)-O(1)     | 63.4(3)  |

|                     |          |
|---------------------|----------|
| O(13)-U(1)-O(5)#1   | 86.2(4)  |
| O(10)-U(1)-O(5)#1   | 90.9(4)  |
| O(8)-U(1)-O(5)#1    | 74.8(3)  |
| O(14)#1-U(1)-O(5)#1 | 75.7(3)  |
| O(2)-U(1)-O(5)#1    | 142.4(3) |
| O(1)-U(1)-O(5)#1    | 154.1(3) |
| O(13)-U(1)-Se(2)    | 114.4(3) |
| O(10)-U(1)-Se(2)    | 63.8(3)  |
| O(8)-U(1)-Se(2)     | 25.0(2)  |
| O(14)#1-U(1)-Se(2)  | 141.1(3) |
| O(2)-U(1)-Se(2)     | 135.1(2) |
| O(1)-U(1)-Se(2)     | 79.5(2)  |
| O(5)#1-U(1)-Se(2)   | 78.2(2)  |
| O(9)-U(2)-O(6)      | 178.9(7) |
| O(9)-U(2)-O(2)#2    | 90.5(5)  |
| O(6)-U(2)-O(2)#2    | 88.5(5)  |
| O(9)-U(2)-O(2)      | 90.5(5)  |
| O(6)-U(2)-O(2)      | 88.5(5)  |
| O(2)#2-U(2)-O(2)    | 58.1(4)  |
| O(9)-U(2)-O(1)#2    | 90.2(2)  |
| O(6)-U(2)-O(1)#2    | 89.8(2)  |
| O(2)#2-U(2)-O(1)#2  | 61.7(3)  |
| O(2)-U(2)-O(1)#2    | 119.8(3) |
| O(9)-U(2)-O(1)      | 90.2(2)  |
| O(6)-U(2)-O(1)      | 89.8(2)  |
| O(2)#2-U(2)-O(1)    | 119.8(3) |
| O(2)-U(2)-O(1)      | 61.7(3)  |
| O(1)#2-U(2)-O(1)    | 178.4(4) |
| O(9)-U(2)-O(3)      | 89.0(5)  |
| O(6)-U(2)-O(3)      | 91.9(5)  |
| O(2)#2-U(2)-O(3)    | 179.2(3) |
| O(2)-U(2)-O(3)      | 121.3(3) |
| O(1)#2-U(2)-O(3)    | 118.9(3) |
| O(1)-U(2)-O(3)      | 59.6(3)  |
| O(9)-U(2)-O(3)#2    | 89.0(5)  |
| O(6)-U(2)-O(3)#2    | 91.9(5)  |

|                     |           |
|---------------------|-----------|
| O(2)#2-U(2)-O(3)#2  | 121.3(3)  |
| O(2)-U(2)-O(3)#2    | 179.2(3)  |
| O(1)#2-U(2)-O(3)#2  | 59.6(3)   |
| O(1)-U(2)-O(3)#2    | 118.9(3)  |
| O(3)-U(2)-O(3)#2    | 59.3(4)   |
| O(9)-U(2)-Se(1)     | 100.4(5)  |
| O(6)-U(2)-Se(1)     | 78.5(5)   |
| O(2)#2-U(2)-Se(1)   | 30.5(2)   |
| O(2)-U(2)-Se(1)     | 30.5(2)   |
| O(1)#2-U(2)-Se(1)   | 90.7(2)   |
| O(1)-U(2)-Se(1)     | 90.7(2)   |
| O(3)-U(2)-Se(1)     | 149.1(2)  |
| O(3)#2-U(2)-Se(1)   | 149.1(2)  |
| O(9)-U(2)-Se(3)     | 86.2(2)   |
| O(6)-U(2)-Se(3)     | 94.3(2)   |
| O(2)#2-U(2)-Se(3)   | 149.5(2)  |
| O(2)-U(2)-Se(3)     | 91.6(2)   |
| O(1)#2-U(2)-Se(3)   | 148.4(2)  |
| O(1)-U(2)-Se(3)     | 30.1(2)   |
| O(3)-U(2)-Se(3)     | 29.8(2)   |
| O(3)#2-U(2)-Se(3)   | 89.0(2)   |
| Se(1)-U(2)-Se(3)    | 120.80(2) |
| O(9)-U(2)-Se(3)#2   | 86.2(2)   |
| O(6)-U(2)-Se(3)#2   | 94.3(2)   |
| O(2)#2-U(2)-Se(3)#2 | 91.6(2)   |
| O(2)-U(2)-Se(3)#2   | 149.5(2)  |
| O(1)#2-U(2)-Se(3)#2 | 30.1(2)   |
| O(1)-U(2)-Se(3)#2   | 148.4(2)  |
| O(3)-U(2)-Se(3)#2   | 89.0(2)   |
| O(3)#2-U(2)-Se(3)#2 | 29.8(2)   |
| Se(1)-U(2)-Se(3)#2  | 120.80(2) |
| Se(3)-U(2)-Se(3)#2  | 118.31(5) |
| O(7)-U(3)-O(11)     | 177.9(6)  |
| O(7)-U(3)-O(12)#3   | 85.3(3)   |
| O(11)-U(3)-O(12)#3  | 94.4(3)   |
| O(7)-U(3)-O(12)#4   | 85.3(3)   |

|                      |          |
|----------------------|----------|
| O(11)-U(3)-O(12)#4   | 94.4(3)  |
| O(12)#3-U(3)-O(12)#4 | 158.2(5) |
| O(7)-U(3)-O(4)#5     | 91.8(5)  |
| O(11)-U(3)-O(4)#5    | 86.1(5)  |
| O(12)#3-U(3)-O(4)#5  | 80.3(2)  |
| O(12)#4-U(3)-O(4)#5  | 80.3(2)  |
| O(7)-U(3)-O(3)       | 91.6(4)  |
| O(11)-U(3)-O(3)      | 90.2(4)  |
| O(12)#3-U(3)-O(3)    | 129.8(3) |
| O(12)#4-U(3)-O(3)    | 70.2(3)  |
| O(4)#5-U(3)-O(3)     | 149.9(2) |
| O(7)-U(3)-O(3)#2     | 91.6(4)  |
| O(11)-U(3)-O(3)#2    | 90.2(4)  |
| O(12)#3-U(3)-O(3)#2  | 70.2(3)  |
| O(12)#4-U(3)-O(3)#2  | 129.8(3) |
| O(4)#5-U(3)-O(3)#2   | 149.9(2) |
| O(3)-U(3)-O(3)#2     | 59.8(4)  |
| O(4)-Se(1)-O(2)#2    | 107.2(4) |
| O(4)-Se(1)-O(2)      | 107.2(4) |
| O(2)#2-Se(1)-O(2)    | 87.0(6)  |
| O(4)-Se(1)-U(2)      | 131.0(5) |
| O(2)#2-Se(1)-U(2)    | 46.1(3)  |
| O(2)-Se(1)-U(2)      | 46.1(3)  |
| O(12)-Se(2)-O(14)    | 101.8(5) |
| O(12)-Se(2)-O(8)     | 102.7(5) |
| O(14)-Se(2)-O(8)     | 98.7(5)  |
| O(12)-Se(2)-U(1)     | 106.3(3) |
| O(14)-Se(2)-U(1)     | 129.2(4) |
| O(8)-Se(2)-U(1)      | 34.3(3)  |
| O(5)-Se(3)-O(3)      | 104.9(5) |
| O(5)-Se(3)-O(1)      | 103.5(4) |
| O(3)-Se(3)-O(1)      | 91.8(4)  |
| O(5)-Se(3)-U(2)      | 116.6(3) |
| O(3)-Se(3)-U(2)      | 46.3(3)  |
| O(1)-Se(3)-U(2)      | 46.1(3)  |
| Se(3)-O(1)-U(1)      | 140.5(5) |

|                    |          |
|--------------------|----------|
| Se(3)-O(1)-U(2)    | 103.8(4) |
| U(1)-O(1)-U(2)     | 114.8(4) |
| Se(1)-O(2)-U(1)    | 127.2(4) |
| Se(1)-O(2)-U(2)    | 103.4(4) |
| U(1)-O(2)-U(2)     | 115.8(3) |
| Se(3)-O(3)-U(3)    | 131.9(5) |
| Se(3)-O(3)-U(2)    | 103.9(4) |
| U(3)-O(3)-U(2)     | 117.9(4) |
| Se(1)-O(4)-U(3)#6  | 125.6(7) |
| Se(3)-O(5)-U(1)#4  | 129.2(5) |
| Se(2)-O(8)-U(1)    | 120.7(5) |
| Se(2)-O(12)-U(3)#1 | 138.5(5) |
| Se(2)-O(14)-U(1)#4 | 123.4(5) |
| C(1)-N(1)-C(5)#7   | 109(2)   |
| C(1)-N(1)-C(3)     | 131(2)   |
| C(5)#7-N(1)-C(3)   | 118(2)   |
| C(1)-N(2)-C(4)     | 123(3)   |
| C(1)-N(2)-C(2)#8   | 106(2)   |
| C(4)-N(2)-C(2)#8   | 130(3)   |
| N(2)-C(1)-N(1)     | 109(2)   |
| C(5)#1-C(2)-N(2)#8 | 112(3)   |
| N(2)-C(4)-C(6)#8   | 109(3)   |
| C(2)#4-C(5)-N(1)#9 | 102(3)   |
| C(4)#8-C(6)-C(7)#7 | 102(3)   |
| C(8)-C(7)-C(6)#9   | 97(4)    |

---

Symmetry transformations used to generate equivalent atoms:

#1  $-x+1/2, -y, z-1/2$  #2  $x, -y+1/2, z$  #3  $-x+1/2, y+1/2, z+1/2$

#4  $-x+1/2, -y, z+1/2$  #5  $x, y, z+1$  #6  $x, y, z-1$

#7  $x-1/2, y, -z+3/2$  #8  $-x, -y, -z+1$  #9  $x+1/2, y, -z+3/2$

Table 8. Anisotropic displacement parameters ( $\text{\AA}^2 \times 10^3$ ) for C2. The anisotropic displacement factor exponent takes the form:  $-2\pi^2 [ h^2 a^{*2} U^{11} + \dots + 2 h k a^* b^* U^{12} ]$

|       | U <sup>11</sup> | U <sup>22</sup> | U <sup>33</sup> | U <sup>23</sup> | U <sup>13</sup> | U <sup>12</sup> |
|-------|-----------------|-----------------|-----------------|-----------------|-----------------|-----------------|
| U(1)  | 29(1)           | 14(1)           | 7(1)            | 0(1)            | -1(1)           | 4(1)            |
| U(2)  | 26(1)           | 12(1)           | 8(1)            | 0               | 0(1)            | 0               |
| U(3)  | 22(1)           | 15(1)           | 8(1)            | 0               | 0(1)            | 0               |
| Se(1) | 22(1)           | 16(1)           | 9(1)            | 0               | -1(1)           | 0               |
| Se(2) | 38(1)           | 15(1)           | 11(1)           | -1(1)           | -6(1)           | 3(1)            |
| Se(3) | 37(1)           | 12(1)           | 9(1)            | 2(1)            | 0(1)            | -2(1)           |



Table 9. Crystal data and structure refinement for C3.

|                                   |                                             |                               |
|-----------------------------------|---------------------------------------------|-------------------------------|
| Identification code               | p21n                                        |                               |
| Empirical formula                 | C20 N4 O22 P4 U3                            |                               |
| Formula weight                    | 1486.21                                     |                               |
| Temperature                       | 174(2) K                                    |                               |
| Wavelength                        | 0.71073 Å                                   |                               |
| Crystal system                    | Monoclinic                                  |                               |
| Space group                       | P 21/n                                      |                               |
| Unit cell dimensions              | a = 9.954(7) Å                              | $\alpha = 90^\circ$ .         |
|                                   | b = 10.264(7) Å                             | $\beta = 101.758(10)^\circ$ . |
|                                   | c = 19.566(14) Å                            | $\gamma = 90^\circ$ .         |
| Volume                            | 1957(2) Å <sup>3</sup>                      |                               |
| Z                                 | 2                                           |                               |
| Density (calculated)              | 2.522 Mg/m <sup>3</sup>                     |                               |
| Absorption coefficient            | 12.628 mm <sup>-1</sup>                     |                               |
| F(000)                            | 1320                                        |                               |
| Crystal size                      | 0.06 x 0.05 x 0.04 mm <sup>3</sup>          |                               |
| Theta range for data collection   | 2.13 to 27.34°.                             |                               |
| Index ranges                      | -12 ≤ h ≤ 12, -13 ≤ k ≤ 13, -25 ≤ l ≤ 25    |                               |
| Reflections collected             | 22325                                       |                               |
| Independent reflections           | 4427 [R(int) = 0.1369]                      |                               |
| Completeness to theta = 27.34°    | 100.0 %                                     |                               |
| Absorption correction             | Semi-empirical from equivalents             |                               |
| Max. and min. transmission        | 0.603 and 0.473                             |                               |
| Refinement method                 | Full-matrix least-squares on F <sup>2</sup> |                               |
| Data / restraints / parameters    | 4427 / 1 / 181                              |                               |
| Goodness-of-fit on F <sup>2</sup> | 0.979                                       |                               |
| Final R indices [I > 2σ(I)]       | R1 = 0.0497, wR2 = 0.1014                   |                               |
| R indices (all data)              | R1 = 0.1448, wR2 = 0.1326                   |                               |
| Largest diff. peak and hole       | 3.486 and -1.624 e.Å <sup>-3</sup>          |                               |

Table 10. Atomic coordinates ( $\times 10^4$ ) and equivalent isotropic displacement parameters ( $\text{\AA}^2 \times 10^3$ ) for C3.  $U(\text{eq})$  is defined as one third of the trace of the orthogonalized  $U_{ij}$  tensor.

|       | x         | y         | z        | U(eq)   |
|-------|-----------|-----------|----------|---------|
| U(1)  | 5000      | 5000      | 0        | 19(1)   |
| U(2)  | 8283(1)   | 5050(1)   | 2542(1)  | 22(1)   |
| P(1)  | 6467(4)   | 7389(4)   | 1272(2)  | 24(1)   |
| P(2)  | 6980(5)   | 2702(4)   | 1210(2)  | 33(1)   |
| O(1)  | 5752(12)  | 3398(9)   | 794(6)   | 39(3)   |
| O(2)  | 5315(11)  | 6514(9)   | 890(5)   | 27(3)   |
| O(3)  | 7605(11)  | 6639(10)  | 1729(6)  | 32(3)   |
| O(4)  | 6703(10)  | 5217(10)  | -113(5)  | 31(3)   |
| O(5)  | 6571(10)  | 4729(9)   | 2629(6)  | 35(3)   |
| O(6)  | 5867(11)  | 8436(9)   | 1682(5)  | 27(3)   |
| O(7)  | 6545(12)  | 1593(11)  | 1614(6)  | 42(3)   |
| O(8)  | 9992(10)  | 5342(9)   | 2450(5)  | 32(3)   |
| O(9)  | 2803(12)  | 11915(10) | -723(6)  | 36(3)   |
| O(10) | 7993(12)  | 3596(10)  | 1644(6)  | 40(3)   |
| O(11) | 7680(15)  | 2130(12)  | 622(7)   | 57(4)   |
| N(1)  | 14112(16) | 2032(14)  | 3856(8)  | 50(4)   |
| N(2)  | 13366(15) | 3432(13)  | 3029(8)  | 43(4)   |
| C(1)  | 3753(18)  | 11038(18) | -203(9)  | 45(5)   |
| C(2)  | 12250(20) | 3167(18)  | 3319(10) | 50(5)   |
| C(3)  | 14525(17) | 2810(16)  | 3350(9)  | 38(4)   |
| C(4)  | 12720(20) | 2268(19)  | 3808(11) | 56(5)   |
| C(5)  | 13300(20) | 4414(19)  | 2408(11) | 60(6)   |
| C(6)  | 15080(20) | 1163(19)  | 4294(10) | 57(6)   |
| C(7)  | 3120(20)  | 10970(20) | 452(11)  | 65(6)   |
| C(8)  | 12920(30) | 3580(20)  | 1805(14) | 96(9)   |
| C(10) | 8840(40)  | 1520(40)  | 749(19)  | 153(14) |
| C(9)  | 10010(40) | 1160(40)  | 1200(20) | 220(20) |

Table 11. Bond lengths [Å] and angles [°] for C3.

---

|             |           |
|-------------|-----------|
| U(1)-O(4)   | 1.768(10) |
| U(1)-O(4)#1 | 1.768(10) |
| U(1)-O(1)   | 2.281(11) |
| U(1)-O(1)#1 | 2.281(11) |
| U(1)-O(2)   | 2.308(9)  |
| U(1)-O(2)#1 | 2.308(9)  |
| U(2)-O(8)   | 1.772(10) |
| U(2)-O(5)   | 1.777(10) |
| U(2)-O(7)#2 | 2.269(11) |
| U(2)-O(10)  | 2.278(11) |
| U(2)-O(3)   | 2.283(10) |
| U(2)-O(6)#3 | 2.289(10) |
| P(1)-O(3)   | 1.504(11) |
| P(1)-O(2)   | 1.526(11) |
| P(1)-O(6)   | 1.533(11) |
| P(1)-O(9)#4 | 1.584(12) |
| P(2)-O(10)  | 1.494(12) |
| P(2)-O(7)   | 1.499(12) |
| P(2)-O(1)   | 1.504(12) |
| P(2)-O(11)  | 1.575(14) |
| O(6)-U(2)#2 | 2.289(10) |
| O(7)-U(2)#3 | 2.269(11) |
| O(9)-C(1)   | 1.53(2)   |
| O(9)-P(1)#4 | 1.584(12) |
| O(11)-C(10) | 1.29(4)   |
| N(1)-C(4)   | 1.39(2)   |
| N(1)-C(3)   | 1.40(2)   |
| N(1)-C(6)   | 1.46(2)   |
| N(2)-C(3)   | 1.36(2)   |
| N(2)-C(2)   | 1.37(2)   |
| N(2)-C(5)   | 1.57(2)   |
| C(1)-C(7)   | 1.54(2)   |
| C(2)-C(4)   | 1.34(2)   |
| C(5)-C(8)   | 1.44(3)   |

|                    |            |
|--------------------|------------|
| C(10)-C(9)         | 1.36(3)    |
| O(4)-U(1)-O(4)#1   | 179.999(1) |
| O(4)-U(1)-O(1)     | 89.2(4)    |
| O(4)#1-U(1)-O(1)   | 90.8(4)    |
| O(4)-U(1)-O(1)#1   | 90.8(4)    |
| O(4)#1-U(1)-O(1)#1 | 89.2(4)    |
| O(1)-U(1)-O(1)#1   | 179.999(1) |
| O(4)-U(1)-O(2)     | 91.4(4)    |
| O(4)#1-U(1)-O(2)   | 88.6(4)    |
| O(1)-U(1)-O(2)     | 89.8(4)    |
| O(1)#1-U(1)-O(2)   | 90.2(4)    |
| O(4)-U(1)-O(2)#1   | 88.6(4)    |
| O(4)#1-U(1)-O(2)#1 | 91.4(4)    |
| O(1)-U(1)-O(2)#1   | 90.2(4)    |
| O(1)#1-U(1)-O(2)#1 | 89.8(4)    |
| O(2)-U(1)-O(2)#1   | 179.999(1) |
| O(8)-U(2)-O(5)     | 179.0(5)   |
| O(8)-U(2)-O(7)#2   | 91.4(4)    |
| O(5)-U(2)-O(7)#2   | 89.5(4)    |
| O(8)-U(2)-O(10)    | 90.3(5)    |
| O(5)-U(2)-O(10)    | 88.8(4)    |
| O(7)#2-U(2)-O(10)  | 175.7(4)   |
| O(8)-U(2)-O(3)     | 87.8(4)    |
| O(5)-U(2)-O(3)     | 92.6(4)    |
| O(7)#2-U(2)-O(3)   | 88.6(4)    |
| O(10)-U(2)-O(3)    | 87.6(4)    |
| O(8)-U(2)-O(6)#3   | 87.5(4)    |
| O(5)-U(2)-O(6)#3   | 92.0(4)    |
| O(7)#2-U(2)-O(6)#3 | 93.4(4)    |
| O(10)-U(2)-O(6)#3  | 90.5(4)    |
| O(3)-U(2)-O(6)#3   | 175.0(4)   |
| O(3)-P(1)-O(2)     | 112.9(6)   |
| O(3)-P(1)-O(6)     | 112.0(7)   |
| O(2)-P(1)-O(6)     | 109.5(6)   |
| O(3)-P(1)-O(9)#4   | 103.9(7)   |

|                  |           |
|------------------|-----------|
| O(2)-P(1)-O(9)#4 | 109.6(7)  |
| O(6)-P(1)-O(9)#4 | 108.7(6)  |
| O(10)-P(2)-O(7)  | 113.6(7)  |
| O(10)-P(2)-O(1)  | 113.3(7)  |
| O(7)-P(2)-O(1)   | 110.9(7)  |
| O(10)-P(2)-O(11) | 107.3(8)  |
| O(7)-P(2)-O(11)  | 108.7(7)  |
| O(1)-P(2)-O(11)  | 102.3(8)  |
| P(2)-O(1)-U(1)   | 146.0(7)  |
| P(1)-O(2)-U(1)   | 137.6(7)  |
| P(1)-O(3)-U(2)   | 149.3(7)  |
| P(1)-O(6)-U(2)#2 | 136.3(6)  |
| P(2)-O(7)-U(2)#3 | 157.9(8)  |
| C(1)-O(9)-P(1)#4 | 114.1(10) |
| P(2)-O(10)-U(2)  | 143.7(8)  |
| C(10)-O(11)-P(2) | 123(2)    |
| C(4)-N(1)-C(3)   | 106.6(16) |
| C(4)-N(1)-C(6)   | 132.7(17) |
| C(3)-N(1)-C(6)   | 120.7(17) |
| C(3)-N(2)-C(2)   | 113.5(16) |
| C(3)-N(2)-C(5)   | 124.1(15) |
| C(2)-N(2)-C(5)   | 122.3(15) |
| O(9)-C(1)-C(7)   | 106.0(14) |
| C(4)-C(2)-N(2)   | 103.7(17) |
| N(2)-C(3)-N(1)   | 104.6(16) |
| C(2)-C(4)-N(1)   | 111.4(18) |
| C(8)-C(5)-N(2)   | 102.6(17) |
| O(11)-C(10)-C(9) | 150(4)    |

---

Symmetry transformations used to generate equivalent atoms:

#1 -x+1,-y+1,-z   #2 -x+3/2,y+1/2,-z+1/2   #3 -x+3/2,y-1/2,-z+1/2

#4 -x+1,-y+2,-z

Table 12. Anisotropic displacement parameters ( $\text{\AA}^2 \times 10^3$ ) for C3. The anisotropic displacement factor exponent takes the form:  $-2p^2 [ h^2 a^*2U^{11} + \dots + 2 h k a^* b^* U^{12} ]$

|       | U <sup>11</sup> | U <sup>22</sup> | U <sup>33</sup> | U <sup>23</sup> | U <sup>13</sup> | U <sup>12</sup> |
|-------|-----------------|-----------------|-----------------|-----------------|-----------------|-----------------|
| U(1)  | 22(1)           | 15(1)           | 16(1)           | -1(1)           | -3(1)           | 0(1)            |
| U(2)  | 24(1)           | 18(1)           | 22(1)           | 1(1)            | -2(1)           | 0(1)            |
| P(1)  | 28(3)           | 16(2)           | 22(3)           | -1(2)           | -7(2)           | 2(2)            |
| P(2)  | 50(3)           | 18(2)           | 25(3)           | 0(2)            | -9(2)           | 0(2)            |
| O(1)  | 59(9)           | 12(6)           | 43(9)           | 2(5)            | 2(7)            | -6(6)           |
| O(2)  | 35(7)           | 22(6)           | 22(7)           | -17(5)          | 2(5)            | 0(5)            |
| O(3)  | 31(7)           | 30(6)           | 31(8)           | 10(5)           | -4(6)           | 9(5)            |
| O(4)  | 28(6)           | 33(7)           | 32(6)           | -14(5)          | 4(5)            | -6(5)           |
| O(5)  | 25(6)           | 29(7)           | 50(7)           | 7(5)            | 2(5)            | 5(5)            |
| O(6)  | 35(7)           | 26(6)           | 17(6)           | 5(5)            | 2(5)            | -5(5)           |
| O(7)  | 53(9)           | 40(7)           | 27(7)           | 13(6)           | -2(6)           | 10(6)           |
| O(8)  | 22(6)           | 31(7)           | 43(7)           | 15(5)           | 3(5)            | 1(5)            |
| O(9)  | 40(8)           | 30(7)           | 38(8)           | 7(6)            | 9(6)            | 6(5)            |
| O(10) | 53(9)           | 33(7)           | 29(8)           | -12(6)          | -5(6)           | 10(6)           |
| O(11) | 70(11)          | 59(9)           | 40(9)           | -15(7)          | 7(8)            | 9(8)            |

Table 13. Crystal data and structure refinement for C4.

|                                   |                                             |                       |
|-----------------------------------|---------------------------------------------|-----------------------|
| Identification code               | pccn                                        |                       |
| Empirical formula                 | C10 N2 O16 Se3 U2                           |                       |
| Formula weight                    | 1117.06                                     |                       |
| Temperature                       | 373(2) K                                    |                       |
| Wavelength                        | 0.71073 Å                                   |                       |
| Crystal system                    | Orthorhombic                                |                       |
| Space group                       | Pccn                                        |                       |
| Unit cell dimensions              | a = 9.987(7) Å                              | $\alpha = 90^\circ$ . |
|                                   | b = 10.251(7) Å                             | $\beta = 90^\circ$ .  |
|                                   | c = 20.957(14) Å                            | $\gamma = 90^\circ$ . |
| Volume                            | 2146(2) Å <sup>3</sup>                      |                       |
| Z                                 | 4                                           |                       |
| Density (calculated)              | 3.458 Mg/m <sup>3</sup>                     |                       |
| Absorption coefficient            | 20.248 mm <sup>-1</sup>                     |                       |
| F(000)                            | 1952                                        |                       |
| Crystal size                      | 0.1 x 0.1 x 0.1 mm <sup>3</sup>             |                       |
| Theta range for data collection   | 1.94 to 27.58°.                             |                       |
| Index ranges                      | -12 ≤ h ≤ 12, -13 ≤ k ≤ 13, -27 ≤ l ≤ 27    |                       |
| Reflections collected             | 23233                                       |                       |
| Independent reflections           | 2479 [R(int) = 0.1201]                      |                       |
| Completeness to theta = 27.58°    | 99.6 %                                      |                       |
| Absorption correction             | Semi-empirical from equivalents             |                       |
| Max. and min. transmission        | 0.7454 and 0.6113                           |                       |
| Refinement method                 | Full-matrix least-squares on F <sup>2</sup> |                       |
| Data / restraints / parameters    | 2479 / 0 / 120                              |                       |
| Goodness-of-fit on F <sup>2</sup> | 1.033                                       |                       |
| Final R indices [I > 2σ(I)]       | R1 = 0.0647, wR2 = 0.1623                   |                       |
| R indices (all data)              | R1 = 0.0941, wR2 = 0.1784                   |                       |
| Largest diff. peak and hole       | 2.718 and -4.545 e. Å <sup>-3</sup>         |                       |

Table 14. Atomic coordinates ( $\times 10^4$ ) and equivalent isotropic displacement parameters ( $\text{\AA}^2 \times 10^3$ ) for C4.  $U(\text{eq})$  is defined as one third of the trace of the orthogonalized  $U_{ij}$  tensor.

|       | x         | y        | z        | $U(\text{eq})$ |
|-------|-----------|----------|----------|----------------|
| U(1)  | 558(1)    | 4447(1)  | 3027(1)  | 19(1)          |
| Se(1) | 2500      | 7500     | 2548(1)  | 24(1)          |
| Se(2) | -880(3)   | 5954(2)  | 1581(1)  | 48(1)          |
| O(1)  | -10(20)   | 5158(19) | 1181(8)  | 53(5)          |
| O(2)  | 1590(15)  | 6623(14) | 2988(6)  | 40(4)          |
| O(3)  | -1590(15) | 3377(14) | 2902(7)  | 40(4)          |
| O(4)  | -672(13)  | 5730(13) | 2299(8)  | 38(4)          |
| O(5)  | -191(13)  | 5103(14) | 3716(6)  | 28(3)          |
| O(6)  | -2364(14) | 5640(18) | 1446(7)  | 49(5)          |
| O(7)  | 1317(13)  | 3753(13) | 2346(5)  | 29(3)          |
| O(8)  | -622(19)  | 7413(14) | 1441(7)  | 50(5)          |
| N(1)  | 2500      | 2500     | 1219(15) | 53(8)          |
| C(1)  | -2500     | 7500     | 60(20)   | 68(11)         |
| C(2)  | 1400(30)  | 2760(30) | 919(13)  | 60(7)          |
| N(2)  | -2500     | 2500     | 4259(18) | 74(10)         |
| C(3)  | 1320(30)  | 2780(30) | 238(14)  | 66(8)          |
| C(4)  | -2400(40) | 3570(40) | 4501(18) | 95(12)         |
| C(5)  | -2630(40) | 3600(50) | 210(20)  | 114(14)        |
| C(6)  | -2500     | 2500     | 480(20)  | 83(14)         |



Table 15. Bond lengths [ $\text{\AA}$ ] and angles [ $^\circ$ ] for C4.

---

|                  |           |
|------------------|-----------|
| U(1)-O(5)        | 1.759(13) |
| U(1)-O(7)        | 1.765(12) |
| U(1)-O(6)#1      | 2.353(14) |
| U(1)-O(4)        | 2.361(13) |
| U(1)-O(8)#2      | 2.365(14) |
| U(1)-O(3)        | 2.423(14) |
| U(1)-O(2)        | 2.458(14) |
| Se(1)-O(2)       | 1.577(13) |
| Se(1)-O(2)#3     | 1.577(13) |
| Se(1)-O(3)#1     | 1.589(13) |
| Se(1)-O(3)#4     | 1.589(13) |
| Se(2)-O(1)       | 1.457(17) |
| Se(2)-O(4)       | 1.535(16) |
| Se(2)-O(6)       | 1.542(14) |
| Se(2)-O(8)       | 1.545(14) |
| O(3)-Se(1)#2     | 1.589(13) |
| O(6)-U(1)#5      | 2.353(14) |
| O(8)-U(1)#4      | 2.365(14) |
| N(1)-C(2)#6      | 1.29(3)   |
| N(1)-C(2)        | 1.29(3)   |
| C(1)-C(3)#7      | 1.36(4)   |
| C(1)-C(3)#8      | 1.36(4)   |
| C(2)-C(3)        | 1.43(4)   |
| N(2)-C(4)#9      | 1.21(4)   |
| N(2)-C(4)        | 1.21(4)   |
| C(3)-C(1)#8      | 1.36(4)   |
| C(4)-C(5)#10     | 1.48(5)   |
| C(5)-C(6)        | 1.27(5)   |
| C(5)-C(4)#11     | 1.48(5)   |
| C(6)-C(5)#9      | 1.27(5)   |
| O(5)-U(1)-O(7)   | 178.6(6)  |
| O(5)-U(1)-O(6)#1 | 90.3(6)   |
| O(7)-U(1)-O(6)#1 | 89.2(5)   |

|                     |           |
|---------------------|-----------|
| O(5)-U(1)-O(4)      | 95.5(6)   |
| O(7)-U(1)-O(4)      | 85.7(6)   |
| O(6)#1-U(1)-O(4)    | 141.6(6)  |
| O(5)-U(1)-O(8)#2    | 87.8(6)   |
| O(7)-U(1)-O(8)#2    | 90.8(6)   |
| O(6)#1-U(1)-O(8)#2  | 73.8(6)   |
| O(4)-U(1)-O(8)#2    | 144.1(6)  |
| O(5)-U(1)-O(3)      | 83.4(5)   |
| O(7)-U(1)-O(3)      | 96.3(6)   |
| O(6)#1-U(1)-O(3)    | 144.5(6)  |
| O(4)-U(1)-O(3)      | 73.8(5)   |
| O(8)#2-U(1)-O(3)    | 71.1(6)   |
| O(5)-U(1)-O(2)      | 81.9(6)   |
| O(7)-U(1)-O(2)      | 99.1(6)   |
| O(6)#1-U(1)-O(2)    | 71.4(6)   |
| O(4)-U(1)-O(2)      | 72.0(5)   |
| O(8)#2-U(1)-O(2)    | 143.5(6)  |
| O(3)-U(1)-O(2)      | 141.1(5)  |
| O(2)-Se(1)-O(2)#3   | 108.4(10) |
| O(2)-Se(1)-O(3)#1   | 110.8(8)  |
| O(2)#3-Se(1)-O(3)#1 | 109.9(8)  |
| O(2)-Se(1)-O(3)#4   | 109.9(8)  |
| O(2)#3-Se(1)-O(3)#4 | 110.8(8)  |
| O(3)#1-Se(1)-O(3)#4 | 107.2(11) |
| O(1)-Se(2)-O(4)     | 113.6(9)  |
| O(1)-Se(2)-O(6)     | 110.5(10) |
| O(4)-Se(2)-O(6)     | 106.2(8)  |
| O(1)-Se(2)-O(8)     | 109.4(10) |
| O(4)-Se(2)-O(8)     | 108.0(8)  |
| O(6)-Se(2)-O(8)     | 109.1(10) |
| Se(1)-O(2)-U(1)     | 141.1(8)  |
| Se(1)#2-O(3)-U(1)   | 145.8(8)  |
| Se(2)-O(4)-U(1)     | 141.9(9)  |
| Se(2)-O(6)-U(1)#5   | 140.3(8)  |
| Se(2)-O(8)-U(1)#4   | 140.2(8)  |
| C(2)#6-N(1)-C(2)    | 122(3)    |

|                    |        |
|--------------------|--------|
| C(3)#7-C(1)-C(3)#8 | 126(4) |
| N(1)-C(2)-C(3)     | 123(3) |
| C(4)#9-N(2)-C(4)   | 130(5) |
| C(1)#8-C(3)-C(2)   | 114(3) |
| N(2)-C(4)-C(5)#10  | 116(4) |
| C(6)-C(5)-C(4)#11  | 115(5) |
| C(5)-C(6)-C(5)#9   | 127(6) |

---

Symmetry transformations used to generate equivalent atoms:

#1  $x+1/2, -y+1, -z+1/2$  #2  $-x, y-1/2, -z+1/2$  #3  $-x+1/2, -y+3/2, z$   
 #4  $-x, y+1/2, -z+1/2$  #5  $x-1/2, -y+1, -z+1/2$  #6  $-x+1/2, -y+1/2, z$   
 #7  $x-1/2, y+1/2, -z$  #8  $-x, -y+1, -z$  #9  $-x-1/2, -y+1/2, z$   
 #10  $-x-1/2, y, z+1/2$  #11  $-x-1/2, y, z-1/2$

Table 16. Anisotropic displacement parameters ( $\text{\AA}^2 \times 10^3$ ) for C4. The anisotropic displacement factor exponent takes the form:  $-2\pi^2 [ h^2 a^{*2} U^{11} + \dots + 2 h k a^* b^* U^{12} ]$

|       | U <sup>11</sup> | U <sup>22</sup> | U <sup>33</sup> | U <sup>23</sup> | U <sup>13</sup> | U <sup>12</sup> |
|-------|-----------------|-----------------|-----------------|-----------------|-----------------|-----------------|
| U(1)  | 22(1)           | 18(1)           | 17(1)           | -1(1)           | 0(1)            | 2(1)            |
| Se(1) | 22(1)           | 18(1)           | 31(1)           | 0               | 0               | -1(1)           |
| Se(2) | 47(1)           | 40(1)           | 55(2)           | 1(1)            | 1(1)            | 1(1)            |
| O(1)  | 64(11)          | 61(11)          | 36(9)           | -2(8)           | 7(8)            | 25(10)          |
| O(2)  | 47(9)           | 42(8)           | 32(7)           | 0(7)            | 6(7)            | -24(8)          |
| O(3)  | 38(8)           | 39(8)           | 43(8)           | -14(7)          | 0(7)            | -19(7)          |
| O(4)  | 30(7)           | 25(7)           | 58(10)          | 20(7)           | -11(7)          | 6(6)            |
| O(5)  | 24(7)           | 34(7)           | 28(7)           | -11(6)          | 6(5)            | -9(6)           |
| O(6)  | 29(8)           | 87(13)          | 32(8)           | -6(8)           | 7(6)            | -29(8)          |
| O(7)  | 32(7)           | 38(8)           | 16(6)           | -1(5)           | -4(5)           | 13(6)           |
| O(8)  | 91(14)          | 29(8)           | 31(8)           | -2(7)           | -1(9)           | -26(9)          |

Table 17. Crystal data and structure refinement for C5.

|                                   |                                             |                               |
|-----------------------------------|---------------------------------------------|-------------------------------|
| Identification code               | p21n                                        |                               |
| Empirical formula                 | C4 N2 O31 P4 U5                             |                               |
| Formula weight                    | 1886.09                                     |                               |
| Temperature                       | 296(2) K                                    |                               |
| Wavelength                        | 0.71073 Å                                   |                               |
| Crystal system                    | Monoclinic                                  |                               |
| Space group                       | P2(1)/n                                     |                               |
| Unit cell dimensions              | a = 9.5152(9) Å                             | $\alpha = 90^\circ$ .         |
|                                   | b = 33.144(3) Å                             | $\beta = 93.2110(10)^\circ$ . |
|                                   | c = 9.6569(10) Å                            | $\gamma = 90^\circ$ .         |
| Volume                            | 3040.7(5) Å <sup>3</sup>                    |                               |
| Z                                 | 4                                           |                               |
| Density (calculated)              | 4.120 Mg/m <sup>3</sup>                     |                               |
| Absorption coefficient            | 26.866 mm <sup>-1</sup>                     |                               |
| F(000)                            | 3224                                        |                               |
| Crystal size                      | 0.1 x 0.08 x 0.06 mm <sup>3</sup>           |                               |
| Theta range for data collection   | 1.23 to 27.53°.                             |                               |
| Index ranges                      | -12 ≤ h ≤ 12, -43 ≤ k ≤ 43, -12 ≤ l ≤ 12    |                               |
| Reflections collected             | 30943                                       |                               |
| Independent reflections           | 6967 [R(int) = 0.0958]                      |                               |
| Completeness to theta = 27.53°    | 99.4 %                                      |                               |
| Absorption correction             | None                                        |                               |
| Refinement method                 | Full-matrix least-squares on F <sup>2</sup> |                               |
| Data / restraints / parameters    | 6967 / 0 / 230                              |                               |
| Goodness-of-fit on F <sup>2</sup> | 1.015                                       |                               |
| Final R indices [I > 2σ(I)]       | R1 = 0.0450, wR2 = 0.1036                   |                               |
| R indices (all data)              | R1 = 0.0684, wR2 = 0.1163                   |                               |
| Largest diff. peak and hole       | 2.930 and -2.577 e. Å <sup>-3</sup>         |                               |

Table 18. Atomic coordinates ( $\times 10^4$ ) and equivalent isotropic displacement parameters ( $\text{\AA}^2 \times 10^3$ ) for C5.  $U(\text{eq})$  is defined as one third of the trace of the orthogonalized  $U_{ij}$  tensor.

|       | x        | y       | z        | U(eq) |
|-------|----------|---------|----------|-------|
| U(1)  | 805(1)   | 2402(1) | 6634(1)  | 12(1) |
| U(2)  | 1815(1)  | 2406(1) | 2667(1)  | 11(1) |
| U(3)  | 5494(1)  | 74(1)   | 7998(1)  | 13(1) |
| U(4)  | 9492(1)  | 76(1)   | 6954(1)  | 12(1) |
| U(5)  | 6440(1)  | 1305(1) | 4429(1)  | 16(1) |
| P(1)  | 7116(3)  | 202(1)  | 4587(3)  | 10(1) |
| P(2)  | 4282(3)  | 2217(1) | 4949(3)  | 11(1) |
| P(3)  | 7850(3)  | 212(1)  | 10387(3) | 15(1) |
| P(4)  | -1681(3) | 2307(1) | 4329(3)  | 12(1) |
| O(1)  | -2410(9) | 2592(2) | 3313(8)  | 14(2) |
| O(2)  | 6161(9)  | -102(3) | 3844(8)  | 18(2) |
| O(3)  | 6991(9)  | 178(3)  | 6179(8)  | 15(2) |
| O(4)  | 8830(10) | -52(3)  | 11266(9) | 21(2) |
| O(5)  | 4358(9)  | 2369(3) | 3449(8)  | 17(2) |
| O(6)  | 8020(9)  | 169(3)  | 8828(8)  | 18(2) |
| O(7)  | -1719(9) | 2470(3) | 5839(9)  | 16(2) |
| O(8)  | -56(9)   | 2303(3) | 4150(8)  | 15(2) |
| O(9)  | 5031(10) | 2510(3) | 5939(9)  | 18(2) |
| O(10) | 2654(9)  | 2238(3) | 5126(8)  | 14(2) |
| O(11) | 8681(10) | 75(3)   | 4484(9)  | 22(2) |
| O(12) | 4803(9)  | 1796(3) | 5121(8)  | 21(2) |
| O(13) | 6317(10) | 88(3)   | 10520(9) | 22(2) |
| O(14) | 5215(10) | 590(3)  | 8165(9)  | 25(2) |
| O(15) | 9787(9)  | 595(3)  | 6815(9)  | 23(2) |
| O(16) | 1831(9)  | 2923(3) | 3087(9)  | 22(2) |
| O(17) | 9189(9)  | -447(3) | 7066(9)  | 22(2) |
| O(18) | 485(9)   | 1893(3) | 6985(8)  | 21(2) |
| O(19) | 6854(9)  | 614(3)  | 4050(8)  | 21(2) |
| O(20) | 5823(10) | -448(3) | 7846(9)  | 28(2) |
| O(21) | 1779(9)  | 1880(3) | 2305(8)  | 20(2) |

|       |          |         |          |       |
|-------|----------|---------|----------|-------|
| O(22) | 1121(9)  | 2913(3) | 6199(8)  | 20(2) |
| O(23) | 5721(10) | 1342(3) | 2747(9)  | 26(2) |
| O(24) | 8080(10) | 659(3)  | 10804(9) | 30(2) |
| O(25) | 7121(10) | 1243(3) | 6150(10) | 30(2) |
| O(26) | -2292(9) | 1894(3) | 4212(9)  | 22(2) |
| O(27) | 8769(10) | 1179(3) | 3320(10) | 29(2) |
| O(28) | 4269(11) | 945(3)  | 5040(10) | 32(2) |
| O(29) | 8755(11) | 1716(3) | 1022(11) | 43(3) |
| O(30) | 1675(14) | 1247(4) | 4730(13) | 65(4) |
| O(31) | 7919(17) | 1184(5) | 8992(16) | 93(5) |
| N(1)  | 2529(15) | 1190(4) | 9547(14) | 43(4) |
| C(1)  | 2330(20) | 1224(6) | 8170(20) | 60(5) |
| N(2)  | 3550(20) | 1440(6) | 7815(19) | 81(6) |
| C(2)  | 3770(20) | 1379(6) | 70(20)   | 61(6) |
| C(3)  | -600(20) | 3493(6) | 3920(20) | 59(5) |
| C(4)  | 8510(20) | -994(7) | 9580(20) | 79(7) |

---

Table 19. Bond lengths [ $\text{\AA}$ ] and angles [ $^\circ$ ] for C5.

---

|              |           |
|--------------|-----------|
| U(1)-O(18)   | 1.750(9)  |
| U(1)-O(22)   | 1.773(9)  |
| U(1)-O(1)#1  | 2.282(8)  |
| U(1)-O(10)   | 2.408(8)  |
| U(1)-O(5)#2  | 2.412(8)  |
| U(1)-O(7)    | 2.490(9)  |
| U(1)-O(8)    | 2.512(8)  |
| U(1)-P(4)    | 3.171(3)  |
| U(1)-U(2)    | 4.0012(7) |
| U(1)-U(2)#2  | 4.0298(7) |
| U(2)-O(16)   | 1.759(9)  |
| U(2)-O(21)   | 1.779(9)  |
| U(2)-O(9)#3  | 2.330(9)  |
| U(2)-O(7)#4  | 2.346(9)  |
| U(2)-O(8)    | 2.372(8)  |
| U(2)-O(5)    | 2.498(9)  |
| U(2)-O(10)   | 2.524(8)  |
| U(2)-P(2)    | 3.190(3)  |
| U(2)-U(1)#4  | 4.0298(7) |
| U(3)-O(14)   | 1.741(10) |
| U(3)-O(20)   | 1.763(10) |
| U(3)-O(2)#5  | 2.310(8)  |
| U(3)-O(3)    | 2.348(8)  |
| U(3)-O(13)#6 | 2.362(9)  |
| U(3)-O(6)    | 2.511(8)  |
| U(3)-O(13)   | 2.516(9)  |
| U(3)-P(3)    | 3.159(3)  |
| U(3)-U(4)    | 3.9902(7) |
| U(3)-U(3)#6  | 4.0595(9) |
| U(4)-O(15)   | 1.748(9)  |
| U(4)-O(17)   | 1.761(9)  |
| U(4)-O(4)#7  | 2.281(9)  |
| U(4)-O(11)#8 | 2.339(9)  |
| U(4)-O(6)    | 2.370(8)  |



|               |           |
|---------------|-----------|
| U(4)-O(11)    | 2.465(9)  |
| U(4)-O(3)     | 2.478(8)  |
| U(4)-P(1)     | 3.152(3)  |
| U(4)-U(4)#8   | 3.9794(9) |
| U(5)-O(23)    | 1.731(9)  |
| U(5)-O(25)    | 1.762(9)  |
| U(5)-O(26)#9  | 2.310(9)  |
| U(5)-O(19)    | 2.357(9)  |
| U(5)-O(12)    | 2.376(9)  |
| U(5)-O(28)    | 2.485(10) |
| U(5)-O(27)    | 2.549(10) |
| P(1)-O(19)    | 1.474(9)  |
| P(1)-O(2)     | 1.512(9)  |
| P(1)-O(3)     | 1.551(8)  |
| P(1)-O(11)    | 1.557(10) |
| P(2)-O(12)    | 1.487(9)  |
| P(2)-O(9)     | 1.512(9)  |
| P(2)-O(5)     | 1.539(9)  |
| P(2)-O(10)    | 1.569(9)  |
| P(3)-O(4)     | 1.506(9)  |
| P(3)-O(13)    | 1.528(10) |
| P(3)-O(6)     | 1.529(8)  |
| P(3)-O(24)    | 1.548(11) |
| P(4)-O(26)    | 1.491(10) |
| P(4)-O(1)     | 1.502(9)  |
| P(4)-O(7)     | 1.557(9)  |
| P(4)-O(8)     | 1.566(9)  |
| O(1)-U(1)#3   | 2.282(8)  |
| O(2)-U(3)#5   | 2.310(8)  |
| O(4)-U(4)#7   | 2.281(9)  |
| O(5)-U(1)#4   | 2.412(8)  |
| O(7)-U(2)#2   | 2.346(9)  |
| O(9)-U(2)#1   | 2.330(9)  |
| O(11)-U(4)#8  | 2.339(9)  |
| O(13)-U(3)#6  | 2.362(9)  |
| O(26)-U(5)#10 | 2.310(9)  |

|              |         |
|--------------|---------|
| N(1)-C(1)    | 1.33(2) |
| N(1)-C(2)#11 | 1.41(2) |
| N(1)-C(4)#6  | 1.48(3) |
| C(1)-N(2)    | 1.42(2) |
| N(2)-C(3)#1  | 1.32(2) |
| C(2)-C(3)#4  | 1.36(3) |
| C(2)-N(1)#12 | 1.41(2) |
| C(3)-N(2)#3  | 1.32(2) |
| C(3)-C(2)#2  | 1.36(3) |
| C(4)-N(1)#6  | 1.48(3) |

|                    |           |
|--------------------|-----------|
| O(18)-U(1)-O(22)   | 177.5(4)  |
| O(18)-U(1)-O(1)#1  | 90.1(3)   |
| O(22)-U(1)-O(1)#1  | 91.8(3)   |
| O(18)-U(1)-O(10)   | 92.4(3)   |
| O(22)-U(1)-O(10)   | 86.1(3)   |
| O(1)#1-U(1)-O(10)  | 83.8(3)   |
| O(18)-U(1)-O(5)#2  | 92.8(3)   |
| O(22)-U(1)-O(5)#2  | 89.0(3)   |
| O(1)#1-U(1)-O(5)#2 | 85.0(3)   |
| O(10)-U(1)-O(5)#2  | 167.6(3)  |
| O(18)-U(1)-O(7)    | 88.4(3)   |
| O(22)-U(1)-O(7)    | 90.8(3)   |
| O(1)#1-U(1)-O(7)   | 152.2(3)  |
| O(10)-U(1)-O(7)    | 124.0(3)  |
| O(5)#2-U(1)-O(7)   | 67.4(3)   |
| O(18)-U(1)-O(8)    | 90.5(3)   |
| O(22)-U(1)-O(8)    | 87.1(3)   |
| O(1)#1-U(1)-O(8)   | 150.4(3)  |
| O(10)-U(1)-O(8)    | 66.6(3)   |
| O(5)#2-U(1)-O(8)   | 124.5(3)  |
| O(7)-U(1)-O(8)     | 57.3(3)   |
| O(18)-U(1)-P(4)    | 84.8(3)   |
| O(22)-U(1)-P(4)    | 93.3(3)   |
| O(1)#1-U(1)-P(4)   | 174.8(2)  |
| O(10)-U(1)-P(4)    | 95.45(19) |

|                    |             |
|--------------------|-------------|
| O(5)#2-U(1)-P(4)   | 96.2(2)     |
| O(7)-U(1)-P(4)     | 28.8(2)     |
| O(8)-U(1)-P(4)     | 29.1(2)     |
| O(18)-U(1)-U(2)    | 104.0(3)    |
| O(22)-U(1)-U(2)    | 73.6(3)     |
| O(1)#1-U(1)-U(2)   | 118.1(2)    |
| O(10)-U(1)-U(2)    | 36.77(18)   |
| O(5)#2-U(1)-U(2)   | 150.8(2)    |
| O(7)-U(1)-U(2)     | 89.09(19)   |
| O(8)-U(1)-U(2)     | 33.85(19)   |
| P(4)-U(1)-U(2)     | 62.50(6)    |
| O(18)-U(1)-U(2)#2  | 85.8(3)     |
| O(22)-U(1)-U(2)#2  | 94.7(3)     |
| O(1)#1-U(1)-U(2)#2 | 119.8(2)    |
| O(10)-U(1)-U(2)#2  | 156.32(18)  |
| O(5)#2-U(1)-U(2)#2 | 35.5(2)     |
| O(7)-U(1)-U(2)#2   | 32.46(19)   |
| O(8)-U(1)-U(2)#2   | 89.75(19)   |
| P(4)-U(1)-U(2)#2   | 60.87(6)    |
| U(2)-U(1)-U(2)#2   | 121.109(15) |
| O(16)-U(2)-O(21)   | 177.9(4)    |
| O(16)-U(2)-O(9)#3  | 92.6(4)     |
| O(21)-U(2)-O(9)#3  | 88.3(3)     |
| O(16)-U(2)-O(7)#4  | 90.3(4)     |
| O(21)-U(2)-O(7)#4  | 91.7(3)     |
| O(9)#3-U(2)-O(7)#4 | 83.1(3)     |
| O(16)-U(2)-O(8)    | 89.9(4)     |
| O(21)-U(2)-O(8)    | 88.3(3)     |
| O(9)#3-U(2)-O(8)   | 84.7(3)     |
| O(7)#4-U(2)-O(8)   | 167.9(3)    |
| O(16)-U(2)-O(5)    | 89.0(3)     |
| O(21)-U(2)-O(5)    | 91.1(3)     |
| O(9)#3-U(2)-O(5)   | 151.3(3)    |
| O(7)#4-U(2)-O(5)   | 68.2(3)     |
| O(8)-U(2)-O(5)     | 123.9(3)    |
| O(16)-U(2)-O(10)   | 90.0(3)     |

|                    |             |
|--------------------|-------------|
| O(21)-U(2)-O(10)   | 88.3(3)     |
| O(9)#3-U(2)-O(10)  | 151.6(3)    |
| O(7)#4-U(2)-O(10)  | 125.2(3)    |
| O(8)-U(2)-O(10)    | 67.0(3)     |
| O(5)-U(2)-O(10)    | 56.9(3)     |
| O(16)-U(2)-P(2)    | 92.0(3)     |
| O(21)-U(2)-P(2)    | 87.1(3)     |
| O(9)#3-U(2)-P(2)   | 175.3(2)    |
| O(7)#4-U(2)-P(2)   | 96.2(2)     |
| O(8)-U(2)-P(2)     | 95.9(2)     |
| O(5)-U(2)-P(2)     | 28.2(2)     |
| O(10)-U(2)-P(2)    | 28.98(19)   |
| O(16)-U(2)-U(1)    | 77.4(3)     |
| O(21)-U(2)-U(1)    | 100.5(3)    |
| O(9)#3-U(2)-U(1)   | 118.8(2)    |
| O(7)#4-U(2)-U(1)   | 154.9(2)    |
| O(8)-U(2)-U(1)     | 36.2(2)     |
| O(5)-U(2)-U(1)     | 89.47(19)   |
| O(10)-U(2)-U(1)    | 34.83(19)   |
| P(2)-U(2)-U(1)     | 62.93(6)    |
| O(16)-U(2)-U(1)#4  | 84.7(3)     |
| O(21)-U(2)-U(1)#4  | 96.5(3)     |
| O(9)#3-U(2)-U(1)#4 | 117.6(2)    |
| O(7)#4-U(2)-U(1)#4 | 34.7(2)     |
| O(8)-U(2)-U(1)#4   | 157.2(2)    |
| O(5)-U(2)-U(1)#4   | 34.14(19)   |
| O(10)-U(2)-U(1)#4  | 90.85(19)   |
| P(2)-U(2)-U(1)#4   | 62.30(6)    |
| U(1)-U(2)-U(1)#4   | 121.179(15) |
| O(14)-U(3)-O(20)   | 178.5(4)    |
| O(14)-U(3)-O(2)#5  | 86.0(4)     |
| O(20)-U(3)-O(2)#5  | 95.3(4)     |
| O(14)-U(3)-O(3)    | 91.5(4)     |
| O(20)-U(3)-O(3)    | 87.9(4)     |
| O(2)#5-U(3)-O(3)   | 80.4(3)     |
| O(14)-U(3)-O(13)#6 | 92.6(4)     |

|                     |            |
|---------------------|------------|
| O(20)-U(3)-O(13)#6  | 88.1(4)    |
| O(2)#5-U(3)-O(13)#6 | 89.3(3)    |
| O(3)-U(3)-O(13)#6   | 168.6(3)   |
| O(14)-U(3)-O(6)     | 89.7(4)    |
| O(20)-U(3)-O(6)     | 88.8(4)    |
| O(2)#5-U(3)-O(6)    | 147.1(3)   |
| O(3)-U(3)-O(6)      | 67.1(3)    |
| O(13)#6-U(3)-O(6)   | 123.6(3)   |
| O(14)-U(3)-O(13)    | 86.2(3)    |
| O(20)-U(3)-O(13)    | 92.9(4)    |
| O(2)#5-U(3)-O(13)   | 155.0(3)   |
| O(3)-U(3)-O(13)     | 123.5(3)   |
| O(13)#6-U(3)-O(13)  | 67.4(4)    |
| O(6)-U(3)-O(13)     | 56.5(3)    |
| O(14)-U(3)-P(3)     | 84.0(3)    |
| O(20)-U(3)-P(3)     | 94.6(3)    |
| O(2)#5-U(3)-P(3)    | 169.0(2)   |
| O(3)-U(3)-P(3)      | 95.1(2)    |
| O(13)#6-U(3)-P(3)   | 95.9(2)    |
| O(6)-U(3)-P(3)      | 28.48(19)  |
| O(13)-U(3)-P(3)     | 28.5(2)    |
| O(14)-U(3)-U(4)     | 100.0(3)   |
| O(20)-U(3)-U(4)     | 78.8(3)    |
| O(2)#5-U(3)-U(4)    | 115.1(2)   |
| O(3)-U(3)-U(4)      | 35.28(19)  |
| O(13)#6-U(3)-U(4)   | 153.1(2)   |
| O(6)-U(3)-U(4)      | 34.02(18)  |
| O(13)-U(3)-U(4)     | 89.7(2)    |
| P(3)-U(3)-U(4)      | 62.39(6)   |
| O(14)-U(3)-U(3)#6   | 89.2(3)    |
| O(20)-U(3)-U(3)#6   | 90.7(3)    |
| O(2)#5-U(3)-U(3)#6  | 123.6(2)   |
| O(3)-U(3)-U(3)#6    | 155.89(19) |
| O(13)#6-U(3)-U(3)#6 | 34.9(2)    |
| O(6)-U(3)-U(3)#6    | 88.84(18)  |
| O(13)-U(3)-U(3)#6   | 32.5(2)    |

|                     |             |
|---------------------|-------------|
| P(3)-U(3)-U(3)#6    | 60.96(6)    |
| U(4)-U(3)-U(3)#6    | 121.063(17) |
| O(15)-U(4)-O(17)    | 179.1(4)    |
| O(15)-U(4)-O(4)#7   | 89.1(4)     |
| O(17)-U(4)-O(4)#7   | 91.7(4)     |
| O(15)-U(4)-O(11)#8  | 92.1(4)     |
| O(17)-U(4)-O(11)#8  | 87.5(4)     |
| O(4)#7-U(4)-O(11)#8 | 85.9(3)     |
| O(15)-U(4)-O(6)     | 92.0(4)     |
| O(17)-U(4)-O(6)     | 88.6(4)     |
| O(4)#7-U(4)-O(6)    | 81.2(3)     |
| O(11)#8-U(4)-O(6)   | 166.4(3)    |
| O(15)-U(4)-O(11)    | 88.3(3)     |
| O(17)-U(4)-O(11)    | 90.8(3)     |
| O(4)#7-U(4)-O(11)   | 153.8(3)    |
| O(11)#8-U(4)-O(11)  | 68.1(4)     |
| O(6)-U(4)-O(11)     | 124.9(3)    |
| O(15)-U(4)-O(3)     | 90.0(3)     |
| O(17)-U(4)-O(3)     | 89.7(4)     |
| O(4)#7-U(4)-O(3)    | 148.5(3)    |
| O(11)#8-U(4)-O(3)   | 125.7(3)    |
| O(6)-U(4)-O(3)      | 67.3(3)     |
| O(11)-U(4)-O(3)     | 57.6(3)     |
| O(15)-U(4)-P(1)     | 85.7(3)     |
| O(17)-U(4)-P(1)     | 93.5(3)     |
| O(4)#7-U(4)-P(1)    | 174.1(2)    |
| O(11)#8-U(4)-P(1)   | 97.1(2)     |
| O(6)-U(4)-P(1)      | 96.1(2)     |
| O(11)-U(4)-P(1)     | 29.0(2)     |
| O(3)-U(4)-P(1)      | 28.96(19)   |
| O(15)-U(4)-U(4)#8   | 90.2(3)     |
| O(17)-U(4)-U(4)#8   | 89.0(3)     |
| O(4)#7-U(4)-U(4)#8  | 120.9(2)    |
| O(11)#8-U(4)-U(4)#8 | 35.1(2)     |
| O(6)-U(4)-U(4)#8    | 157.8(2)    |
| O(11)-U(4)-U(4)#8   | 33.1(2)     |

|                    |             |
|--------------------|-------------|
| O(3)-U(4)-U(4)#8   | 90.63(18)   |
| P(1)-U(4)-U(4)#8   | 62.06(6)    |
| O(15)-U(4)-U(3)    | 100.4(3)    |
| O(17)-U(4)-U(3)    | 79.7(3)     |
| O(4)#7-U(4)-U(3)   | 116.5(2)    |
| O(11)#8-U(4)-U(3)  | 154.2(2)    |
| O(6)-U(4)-U(3)     | 36.3(2)     |
| O(11)-U(4)-U(3)    | 89.6(2)     |
| O(3)-U(4)-U(3)     | 33.18(18)   |
| P(1)-U(4)-U(3)     | 61.85(6)    |
| U(4)#8-U(4)-U(3)   | 121.661(17) |
| O(23)-U(5)-O(25)   | 177.0(5)    |
| O(23)-U(5)-O(26)#9 | 92.1(4)     |
| O(25)-U(5)-O(26)#9 | 91.0(4)     |
| O(23)-U(5)-O(19)   | 89.1(4)     |
| O(25)-U(5)-O(19)   | 88.8(4)     |
| O(26)#9-U(5)-O(19) | 135.6(3)    |
| O(23)-U(5)-O(12)   | 89.1(4)     |
| O(25)-U(5)-O(12)   | 91.5(4)     |
| O(26)#9-U(5)-O(12) | 78.4(3)     |
| O(19)-U(5)-O(12)   | 145.9(3)    |
| O(23)-U(5)-O(28)   | 88.1(4)     |
| O(25)-U(5)-O(28)   | 89.3(4)     |
| O(26)#9-U(5)-O(28) | 150.7(3)    |
| O(19)-U(5)-O(28)   | 73.7(3)     |
| O(12)-U(5)-O(28)   | 72.3(3)     |
| O(23)-U(5)-O(27)   | 85.7(4)     |
| O(25)-U(5)-O(27)   | 95.4(4)     |
| O(26)#9-U(5)-O(27) | 68.3(3)     |
| O(19)-U(5)-O(27)   | 67.6(3)     |
| O(12)-U(5)-O(27)   | 146.0(3)    |
| O(28)-U(5)-O(27)   | 140.8(3)    |
| O(19)-P(1)-O(2)    | 111.4(5)    |
| O(19)-P(1)-O(3)    | 112.1(5)    |
| O(2)-P(1)-O(3)     | 110.9(5)    |
| O(19)-P(1)-O(11)   | 111.9(5)    |

|                  |          |
|------------------|----------|
| O(2)-P(1)-O(11)  | 109.9(5) |
| O(3)-P(1)-O(11)  | 100.1(5) |
| O(19)-P(1)-U(4)  | 118.6(4) |
| O(2)-P(1)-U(4)   | 130.1(4) |
| O(3)-P(1)-U(4)   | 50.6(3)  |
| O(11)-P(1)-U(4)  | 50.2(3)  |
| O(12)-P(2)-O(9)  | 112.9(5) |
| O(12)-P(2)-O(5)  | 112.3(5) |
| O(9)-P(2)-O(5)   | 109.9(5) |
| O(12)-P(2)-O(10) | 110.8(5) |
| O(9)-P(2)-O(10)  | 109.6(5) |
| O(5)-P(2)-O(10)  | 100.8(5) |
| O(12)-P(2)-U(2)  | 119.3(4) |
| O(9)-P(2)-U(2)   | 127.8(4) |
| O(5)-P(2)-U(2)   | 50.0(3)  |
| O(10)-P(2)-U(2)  | 51.2(3)  |
| O(4)-P(3)-O(13)  | 111.1(5) |
| O(4)-P(3)-O(6)   | 113.9(5) |
| O(13)-P(3)-O(6)  | 102.2(5) |
| O(4)-P(3)-O(24)  | 109.6(5) |
| O(13)-P(3)-O(24) | 110.9(5) |
| O(6)-P(3)-O(24)  | 108.9(5) |
| O(4)-P(3)-U(3)   | 136.0(4) |
| O(13)-P(3)-U(3)  | 51.7(3)  |
| O(6)-P(3)-U(3)   | 51.5(3)  |
| O(24)-P(3)-U(3)  | 114.4(4) |
| O(26)-P(4)-O(1)  | 111.3(5) |
| O(26)-P(4)-O(7)  | 111.1(5) |
| O(1)-P(4)-O(7)   | 111.1(5) |
| O(26)-P(4)-O(8)  | 111.5(5) |
| O(1)-P(4)-O(8)   | 110.9(5) |
| O(7)-P(4)-O(8)   | 100.5(5) |
| O(26)-P(4)-U(1)  | 114.6(4) |
| O(1)-P(4)-U(1)   | 134.0(4) |
| O(7)-P(4)-U(1)   | 50.5(3)  |
| O(8)-P(4)-U(1)   | 51.4(3)  |



|                     |           |
|---------------------|-----------|
| P(4)-O(1)-U(1)#3    | 140.1(5)  |
| P(1)-O(2)-U(3)#5    | 134.7(5)  |
| P(1)-O(3)-U(3)      | 146.4(5)  |
| P(1)-O(3)-U(4)      | 100.4(4)  |
| U(3)-O(3)-U(4)      | 111.5(3)  |
| P(3)-O(4)-U(4)#7    | 146.1(6)  |
| P(2)-O(5)-U(1)#4    | 147.8(5)  |
| P(2)-O(5)-U(2)      | 101.8(4)  |
| U(1)#4-O(5)-U(2)    | 110.3(3)  |
| P(3)-O(6)-U(4)      | 149.7(5)  |
| P(3)-O(6)-U(3)      | 100.0(4)  |
| U(4)-O(6)-U(3)      | 109.6(3)  |
| P(4)-O(7)-U(2)#2    | 144.2(5)  |
| P(4)-O(7)-U(1)      | 100.6(4)  |
| U(2)#2-O(7)-U(1)    | 112.8(3)  |
| P(4)-O(8)-U(2)      | 147.6(5)  |
| P(4)-O(8)-U(1)      | 99.5(4)   |
| U(2)-O(8)-U(1)      | 110.0(3)  |
| P(2)-O(9)-U(2)#1    | 145.9(5)  |
| P(2)-O(10)-U(1)     | 146.6(5)  |
| P(2)-O(10)-U(2)     | 99.8(4)   |
| U(1)-O(10)-U(2)     | 108.4(3)  |
| P(1)-O(11)-U(4)#8   | 147.3(5)  |
| P(1)-O(11)-U(4)     | 100.8(4)  |
| U(4)#8-O(11)-U(4)   | 111.9(4)  |
| P(2)-O(12)-U(5)     | 146.3(5)  |
| P(3)-O(13)-U(3)#6   | 147.6(5)  |
| P(3)-O(13)-U(3)     | 99.8(4)   |
| U(3)#6-O(13)-U(3)   | 112.6(4)  |
| P(1)-O(19)-U(5)     | 150.5(5)  |
| P(4)-O(26)-U(5)#10  | 166.8(6)  |
| C(1)-N(1)-C(2)#11   | 113.0(16) |
| C(1)-N(1)-C(4)#6    | 122.6(17) |
| C(2)#11-N(1)-C(4)#6 | 124.3(16) |
| N(1)-C(1)-N(2)      | 102.2(17) |
| C(3)#1-N(2)-C(1)    | 111.2(18) |

C(3)#4-C(2)-N(1)#12 104.1(17)

N(2)#3-C(3)-C(2)#2 109(2)

---

Symmetry transformations used to generate equivalent atoms:

#1  $x+1/2, -y+1/2, z+1/2$  #2  $x-1/2, -y+1/2, z+1/2$

#3  $x-1/2, -y+1/2, z-1/2$  #4  $x+1/2, -y+1/2, z-1/2$

#5  $-x+1, -y, -z+1$  #6  $-x+1, -y, -z+2$  #7  $-x+2, -y, -z+2$

#8  $-x+2, -y, -z+1$  #9  $x+1, y, z$  #10  $x-1, y, z$  #11  $x, y, z+1$

#12  $x, y, z-1$

Table 20. Anisotropic displacement parameters ( $\text{\AA}^2 \times 10^3$ ) for C5. The anisotropic displacement factor exponent takes the form:  $-2\pi^2 [ h^2 a^{*2} U^{11} + \dots + 2 h k a^* b^* U^{12} ]$

|      | U <sup>11</sup> | U <sup>22</sup> | U <sup>33</sup> | U <sup>23</sup> | U <sup>13</sup> | U <sup>12</sup> |
|------|-----------------|-----------------|-----------------|-----------------|-----------------|-----------------|
| U(1) | 10(1)           | 18(1)           | 7(1)            | -1(1)           | 0(1)            | 1(1)            |
| U(2) | 9(1)            | 18(1)           | 8(1)            | 1(1)            | 0(1)            | 0(1)            |
| U(3) | 9(1)            | 21(1)           | 8(1)            | 0(1)            | 0(1)            | -1(1)           |
| U(4) | 9(1)            | 20(1)           | 7(1)            | 0(1)            | 0(1)            | 1(1)            |
| U(5) | 17(1)           | 16(1)           | 14(1)           | 0(1)            | 0(1)            | 2(1)            |
| P(1) | 9(2)            | 16(2)           | 6(1)            | -4(1)           | -1(1)           | 1(1)            |
| P(2) | 9(2)            | 17(2)           | 8(1)            | 0(1)            | 0(1)            | 0(1)            |
| P(3) | 9(2)            | 31(2)           | 6(1)            | 1(1)            | 1(1)            | 1(1)            |
| P(4) | 9(2)            | 18(2)           | 9(1)            | 0(1)            | 0(1)            | 0(1)            |

**Table 21: Bond valence sums (V.U.) for Compound 1**

|     |      |
|-----|------|
| U1  | 5.83 |
| As1 | 5.06 |
| O1  | 1.64 |
| O2  | 1.91 |
| O3  | 1.91 |
| O4  | 1.82 |
| O5  | 1.64 |
| O6  | 1.98 |

**Table 22: Bond valence sums (V.U.) for Compound 2**

|     |      |
|-----|------|
| U1  | 6.21 |
| U2  | 6.06 |
| U3  | 6.64 |
| Se1 | 4.58 |
| Se2 | 4.01 |
| Se3 | 4.28 |
| O1  | 2.12 |
| O2  | 2.14 |
| O3  | 2.29 |
| O4  | 2.05 |
| O5  | 1.91 |
| O6  | 1.84 |
| O7  | 1.76 |
| O8  | 2.54 |
| O9  | 2.00 |
| O10 | 1.83 |
| O11 | 1.91 |
| O12 | 1.96 |
| O13 | 1.73 |
| O14 | 1.80 |

**Table 23: Bond valence sums (V.U.) for Compound 3**

|    |      |
|----|------|
| U1 | 6.24 |
| U2 | 6.27 |
| P1 | 4.81 |
| P2 | 5.01 |
| O1 | 1.98 |
| O2 | 1.87 |
| O3 | 1.97 |
| O4 | 1.79 |

|     |      |
|-----|------|
| O5  | 1.87 |
| O6  | 2.01 |
| O7  | 1.81 |
| O8  | 1.81 |
| O9  | 2.01 |
| O10 | 2.30 |

**Table 24: Bond valence sums (V.U.) for Compound 4**

|     |      |
|-----|------|
| U1  | 6.34 |
| Se1 | 5.49 |
| Se2 | 6.54 |
| O1  | 1.93 |
| O2  | 1.86 |
| O3  | 1.85 |
| O4  | 1.85 |
| O5  | 2.11 |
| O6  | 1.83 |
| O7  | 2.08 |

**Table 25: Bond valence sums (V.U.) for Compound 5**

|     |      |
|-----|------|
| U1  | 5.91 |
| U2  | 5.89 |
| U3  | 6.03 |
| U4  | 6.12 |
| U5  | 6.05 |
| P1  | 4.99 |
| P2  | 4.95 |
| P3  | 4.92 |
| P4  | 4.92 |
| O1  | 1.95 |
| O2  | 1.88 |
| O3  | 2.13 |
| O4  | 1.93 |
| O5  | 2.09 |
| O6  | 2.15 |
| O7  | 2.11 |
| O8  | 2.03 |
| O9  | 1.85 |
| O10 | 1.98 |
| O11 | 2.14 |
| O12 | 1.89 |
| O13 | 2.16 |

|     |          |
|-----|----------|
| O14 | 1.81     |
| O15 | 1.79     |
| O16 | 1.75     |
| O17 | 1.74     |
| O18 | 1.78     |
| O19 | 1.96     |
| O20 | 1.74     |
| O21 | 1.68     |
| O22 | 1.70     |
| O23 | 1.85     |
| O24 | 1.16     |
| O25 | 1.74     |
| O26 | 1.95     |
| O27 | 0.37     |
| O28 | 0.42     |
| O29 | No bonds |
| O30 | No bonds |
| O31 | No bonds |
